# Supplementary material for: Li(glycine)(CF3SO3) as an effective and recoverable catalyst for the preparation of 3,4-dihydropyrimidine-2-(1H)-one under solvent-free conditions
Source: Royal Society of Chemistry journal article supplement (doi:10.1039/c4ra07334g), 2014-10-17

## **Li(Glycine)(CF<sub>3</sub>SO<sub>3</sub>) as an effective and recoverable catalyst for the preparation of 3,4-dihydropyrimidine-2-(1H)-one under solvent-free conditions**

Esmayeel Abbaspour-Gilandeh<sup>a\*</sup>, Seyyedeh Cobra Azimi<sup>b</sup> and Aidin Mohammadi-Barkchai

<sup>a</sup>Young Researchers and Elites Club, Ardabil Branch, Islamic Azad University, Ardabil, Iran. E-mail:

abbaspour1365@yahoo.com; Fax: +98 4513332238

### **General procedure for preparation of 3,4-dihydropyrimidine-2-(1H)-one derivative**

A mixture of aldehyde (1 mmol), ethyl acetoacetate (1 mmol), urea (2 mmol) and Li(Glycine)(CF<sub>3</sub>SO<sub>3</sub>) (10 mol%) was sealed and stirred at 80 °C under solvent-free conditions. After completion of the reaction, as indicated by precipitation of solid products from the liquid reaction mixture and TLC experiments, the reaction mixture was diluted with ethanol (10 ml) and stirred for 5 min. The solid catalyst was successfully recovered after evaporation of water under reduced pressure which can be reused. The product was found to be pure and no further purification was necessary.

### **Physical Data and NMR Data of All Compounds**

**3,4-Dihydro-5-etoxy carbonyl-4-(4-phenyl)-6-methyl-pyrimidine-2(1H)-one (4a):** White powder; mp 203-205 °C (lit. 202-203 °C). <sup>1</sup>H NMR (400 MHz, DMSO-d<sub>6</sub>): δ 1.15 (t, *J* = 7.6 Hz, 3H, CH<sub>3</sub>), 2.24 (s, 3H, CH<sub>3</sub>), 4.06 (q, *J* = 7.6 Hz, 2H, CH<sub>2</sub>), 5.25 (s, 1H, CH), 6.29 (s, 1H, NH), 7.28-7.59 (m, 5H, H-Aro), 9.66 (s, 1H, NH). <sup>13</sup>C NMR (100 MHz, DMSO-d<sub>6</sub>): δ 14.7, 18.3, 55.2, 61.6, 100.8, 127.5, 128.3, 129.9, 144.1, 145.2, 152.3, 166.5.

**3,4-Dihydro-5-etoxy carbonyl-4-(2-chlorophenyl)-6-methyl-pyrimidine-2(1H)-one (4b):** White powder; mp 216-219 °C (lit. 215-218 °C). <sup>1</sup>H NMR (400 MHz, DMSO-d<sub>6</sub>): δ 1.06 (t, *J* = 7.2 Hz, 3H, CH<sub>3</sub>), 2.33 (s, 3H, CH<sub>3</sub>), 3.97 (q, *J* = 6.8 Hz, 2H, CH<sub>2</sub>), 5.22 (s, 1H, CH), 5.80 (s, 1H, NH), 6.91-7.14 (m, 4H, H-Aro), 9.27 (s, 1H, NH). <sup>13</sup>C NMR (100 MHz, DMSO-d<sub>6</sub>): δ 14.8, 17.3, 54.3, 60.7, 100.6, 112.8, 122.1, 127.5, 129.1, 131.8, 151.3, 155.9, 158.0, 166.4.

**3,4-Dihydro-5-etoxy carbonyl-4-(3-chlorophenyl)-6-methyl-pyrimidine-2(1H)-one (4c):** White powder; mp 193-195 °C (lit. 192-193 °C). <sup>1</sup>H NMR (400 MHz, DMSO-d<sub>6</sub>): δ 1.14 (t, *J* = 7.2 Hz, 3H, CH<sub>3</sub>), 2.38 (s, 3H, CH<sub>3</sub>), 4.03 (q, *J* = 7.6 Hz, 2H, CH<sub>2</sub>), 5.20 (d, *J* = 2.8 Hz, 1H, CH), 6.83-7.02 (m, 4H, H-Aro), 7.84 (s, 1H, NH), 9.42 (s, 1H, NH). <sup>13</sup>C NMR (100 MHz, DMSO-d<sub>6</sub>): δ 14.9, 18.2, 54.3, 61.4, 100.8, 113.3, 113.8, 121.8, 131.5, 147.2, 149.4, 154.0, 161.6, 167.5.

**3,4-Dihydro-5-etoxy carbonyl-4-(4-chlorophenyl)-6-methyl-pyrimidine-2(1H)-one (4d):** White powder; mp 211-213 °C (lit. 212-214 °C). <sup>1</sup>H NMR (400 MHz, DMSO-d<sub>6</sub>): δ 1.17 (t, *J* = 8.0 Hz, 3H, CH<sub>3</sub>), 2.24 (s, 3H, CH<sub>3</sub>), 3.92 (q, *J* = 8.0 Hz, 2H, CH<sub>2</sub>), 5.09 (d, *J* = 2.8 Hz, 1H, CH), 6.29 (s, 1H, NH), 6.88 (d, *J* = 8.0 Hz, 2H, H-Aro), 7.18 (d, *J* = 8.0 Hz, 2H, H-Aro), 9.76 (s, 1H, NH). <sup>13</sup>C NMR (100 MHz, DMSO-d<sub>6</sub>): δ 15.4, 18.5, 53.1, 60.1, 100.9, 122.9, 123.7, 125.8, 142.4, 150.3, 153.9, 167.4.

**3,4-Dihydro-5-etoxy carbonyl-4-(3-bromophenyl)-6-methyl-pyrimidine-2(1H)-one (4e):** White powder; mp 185-187 °C (lit. 185-186 °C). IR (KBr, cm<sup>-1</sup>): *ν* 3200, 3100, 2920, 1690, 1590, 1450. <sup>1</sup>H NMR (400 MHz, DMSO-d<sub>6</sub>): δ 1.10 (t, *J* = 6.4 Hz, 3H, CH<sub>3</sub>), 2.25 (s, 3H, CH<sub>3</sub>), 3.98-4.05 (m, 2H, CH<sub>2</sub>), 5.21 (d, *J* = 2.8 Hz, 1H, CH), 5.59 (s, 1H,

NH), 6.79-6.82 (m, 2H, H Aro), 7.07-7.10 (m, 2H, H-Aro), 9.27 (s, 1H, NH). <sup>13</sup>C NMR (100 MHz, DMSO-d<sub>6</sub>): δ 14.4, 15.9, 54.5, 61.0, 99.3, 120.9, 125.0, 129.5, 131.5, 131.8, 145.5, 146.0, 162.5, 165.1.

**3,4-Dihydro-5-etoxy-carbonyl-4-(2,4-dichlorophenyl)-6-methyl-pyrimidine-2(1H)-one (4f):** Whitepowder; mp 249-251 °C (lit. 251-252 °C). IR (KBr, cm<sup>-1</sup>): ν 3160, 3000, 2980, 1785, 1660, 1425. <sup>1</sup>H NMR (400 MHz, DMSO-d<sub>6</sub>): δ 0.82 (t, *J*= 6.8 Hz, 3H, CH<sub>3</sub>), 2.20 (s, 3H, CH<sub>3</sub>), 4.10 (q, *J*= 6.8 Hz, 2H, CH<sub>2</sub>), 5.36 (s, 1H, CH), 5.59 (s, 1H, NH), 7.37-7.56 (m, 3H, H-Aro), 8.70 (s, 1H, NH). <sup>13</sup>C NMR (100 MHz, DMSO-d<sub>6</sub>): δ 15.5, 18.7, 55.7, 60.0, 95.7, 128.5, 129.2, 130.1, 133.3, 134.0, 150.0, 156.1, 161.0, 165.8.

**3,4-Dihydro-5-etoxy-carbonyl-4-(3,4-dichlorophenyl)-6-methyl-pyrimidine-2(1H)-one (4g):** Whitepowder; mp 223-225 °C (lit. 222-223 °C). <sup>1</sup>H NMR (400 MHz, DMSO-d<sub>6</sub>): δ 1.07 (t, *J*= 8.0 Hz, 3H, CH<sub>3</sub>), 2.30 (s, 3H, CH<sub>3</sub>), 3.91 (q, *J*= 8.0 Hz, 2H, CH<sub>2</sub>), 5.08 (d, *J*= 2.4 Hz, 1H, CH), 6.82-6.98 (m, 3H, H-Aro), 7.94 (s, 1H, NH), 9.14 (s, 1H, NH). <sup>13</sup>C NMR (100 MHz, DMSO-d<sub>6</sub>): δ 14.9, 18.2, 54.3, 61.4, 100.8, 113.3, 113.8, 121.8, 131.5, 147.2, 149.4, 154.0, 161.6, 167.5.

**3,4-Dihydro-5-etoxy-carbonyl-4-(4-fluorophenyl)-6-methyl-pyrimidine-2(1H)-one (4h):** Whitepowder; mp 178-180 °C (lit. 175-177 °C). <sup>1</sup>H NMR (400 MHz, DMSO-d<sub>6</sub>): δ 1.13 (t, *J*= 6.8 Hz, 3H, CH<sub>3</sub>), 2.27 (s, 3H, CH<sub>3</sub>), 4.03 (q, *J*= 8.0 Hz, 2H, CH<sub>2</sub>), 5.23 (d, *J*= 2.8 Hz, 1H, CH), 7.10 (d, *J*= 8.0 Hz, 2H, H-Aro), 7.20 (d, *J*= 8.0 Hz, 2H, H-Aro), 7.84 (s, 1H, NH), 9.25 (s, 1H, NH). <sup>13</sup>C NMR (100 MHz, DMSO-d<sub>6</sub>): δ 14.4, 19.8, 54.3, 60.0, 100.5, 115.5, 129.4, 148.9, 156.2, 161.0, 162.1, 166.8.

**3,4-Dihydro-5-etoxy-carbonyl-4-(2-nitrophenyl)-6-methyl-pyrimidine-2(1H)-one (4i):** Whitepowder; mp 218-220 °C (lit. 220-222 °C). <sup>1</sup>H NMR (400 MHz, DMSO-d<sub>6</sub>): δ 1.03 (t, *J*= 7.2 Hz, 3H, CH<sub>3</sub>), 2.32 (s, 3H, CH<sub>3</sub>), 3.92 (q, *J*= 8.0 Hz, 2H, CH<sub>2</sub>), 5.51 (s, 1H, CH), 6.90-7.30 (m, 4H, H-Aro), 7.82 (s, 1H, NH), 9.17 (s, 1H, NH). <sup>13</sup>C NMR (100 MHz, DMSO-d<sub>6</sub>): δ 14.8, 17.3, 55.6, 60.8, 100.5, 112.9, 122.1, 130.7, 132.9, 134.9, 151.4, 155.8, 161.4, 166.4.

**3,4-Dihydro-5-etoxy-carbonyl-4-(3-nitrophenyl)-6-methyl-pyrimidine-2(1H)-one (4j):** Whitepowder; mp 225-227 °C (lit. 226-228 °C). <sup>1</sup>H NMR (400 MHz, DMSO-d<sub>6</sub>): δ 1.15 (t, *J*= 8.0 Hz, 3H, CH<sub>3</sub>), 2.25 (s, 3H, CH<sub>3</sub>), 4.04 (q, *J*= 8.0 Hz, 2H, CH<sub>2</sub>), 5.17 (d, *J*= 2.8 Hz, 1H, CH), 6.83-7.26 (m, 4H, H-Aro), 7.85 (s, 1H, NH), 9.22 (s, 1H, NH). <sup>13</sup>C NMR (100 MHz, DMSO-d<sub>6</sub>): δ 15.4, 17.9, 52.8, 59.4, 100.6, 113.7, 121.8, 132.5, 142.4, 149.4, 149.9, 154.0, 161.6, 166.4.

**3,4-Dihydro-5-etoxy-carbonyl-4-(4-nitrophenyl)-6-methyl-pyrimidine-2(1H)-one (4k):** Whitepowder; mp 211-213 °C (lit. 208-211 °C). <sup>1</sup>H NMR (400 MHz, DMSO-d<sub>6</sub>): δ 1.13 (t, *J*= 8.0 Hz, 3H, CH<sub>3</sub>), 2.30 (s, 3H, CH<sub>3</sub>), 4.05 (q, *J*= 8.0 Hz, 2H, CH<sub>2</sub>), 5.35 (d, *J*= 2.8 Hz, 1H, CH), 7.36 (d, *J*= 7.2 Hz, 2H, H-Aro), 7.93 (s, 1H, NH), 8.23 (d, *J*= 7.6 Hz, 2H, H-Aro), 9.37 (s, 1H, NH). <sup>13</sup>C NMR (100 MHz, DMSO-d<sub>6</sub>): δ 14.9, 19.3, 55.2, 61.4, 100.5, 123.8, 124.7, 126.9, 142.6, 150.8, 154.9, 166.8.

**3,4-Dihydro-5-etoxy-carbonyl-4-(2-methoxyphenyl)-6-methyl-pyrimidine-2(1H)-one (4l):** Whitepowder; mp 258-260 °C (lit. 259-260 °C). <sup>1</sup>H NMR (400 MHz, DMSO-d<sub>6</sub>): δ 1.06 (t, *J*= 7.6 Hz, 3H, CH<sub>3</sub>), 2.25 (s, 3H, CH<sub>3</sub>), 3.84 (s, 3H, OCH<sub>3</sub>), 3.87 (q, *J*= 6.8 Hz, 2H, CH<sub>2</sub>), 5.49 (s, 1H, CH), 6.30 (s, 1H, NH), 6.90-7.31 (m, 4H, H-Aro), 9.15 (s, 1H, NH). <sup>13</sup>C NMR (100 MHz, DMSO-d<sub>6</sub>): δ 14.9, 18.7, 43.6, 56.9, 59.4, 95.8, 112.3, 122.7, 129.7, 129.9, 131.8, 149.9, 151.8, 157.7, 166.8.

**3,4-Dihydro-5-etoxy-carbonyl-4-(3-methoxyphenyl)-6-methyl-pyrimidine-2(1H)-one (4m):** Whitepowder; mp 208-210 °C (lit. 207-208°C). <sup>1</sup>H NMR (400 MHz, DMSO-d<sub>6</sub>): δ 1.13 (t, *J* = 8.0 Hz, 3H, CH<sub>3</sub>), 2.51 (s, 3H, CH<sub>3</sub>), 3.91 (s, 3H, OCH<sub>3</sub>), 4.06 (q, *J* = 7.6 Hz, 2H, CH<sub>2</sub>), 5.21 (d, *J* = 2.8 Hz, 1H, CH), 6.82-7.17 (m, 4H, H-Aro), 7.30 (s, 1H, NH), 9.52 (s, 1H, NH). <sup>13</sup>C NMR (100 MHz, DMSO-d<sub>6</sub>): δ 14.4, 19.5, 50.3, 50.7, 60.8, 100.9, 113.7, 113.9, 121.0, 139.9, 143.0, 147.0, 153.9, 161.6, 167.5.

**3,4-Dihydro-5-etoxy-carbonyl-4-(4-methoxyphenyl)-6-methyl-pyrimidine-2(1H)-one (4n):** Whitepowder; mp 203-205 °C (lit. 203-204°C). <sup>1</sup>H NMR (400 MHz, DMSO-d<sub>6</sub>): δ 1.14 (t, *J* = 7.2 Hz, 3H, CH<sub>3</sub>), 2.25 (s, 3H, CH<sub>3</sub>), 2.90 (s, 3H, OCH<sub>3</sub>), 3.46 (q, *J* = 7.6 Hz, 2H, CH<sub>2</sub>), 5.12 (s, 1H, CH), 6.91 (d, *J* = 6.8 Hz, 2H, H-Aro), 7.19 (d, *J* = 6.8 Hz, 2H, H-Aro), 7.76 (s, 1H, NH), 9.12 (s, 1H, NH). <sup>13</sup>C NMR (100 MHz, DMSO-d<sub>6</sub>): δ 14.8, 18.8, 56.5, 57.8, 66.8, 100.6, 114.7, 127.6, 138.6, 148.2, 154.8, 158.8, 166.9.

**3,4-Dihydro-5-etoxy-carbonyl-4-(3,4-dimethoxyphenyl)-6-methyl-pyrimidine-2(1H)-one (4o):** Whitepowder; mp 176-178 °C (lit. 174-176°C). <sup>1</sup>H NMR (400 MHz, DMSO-d<sub>6</sub>): δ 1.15 (t, *J* = 6.8 Hz, 3H, CH<sub>3</sub>), 2.30-2.31 (m, 6H, CH<sub>3</sub>, OCH<sub>3</sub>), 2.43 (s, 3H, OCH<sub>3</sub>), 4.05 (q, *J* = 7.6 Hz, 2H, CH<sub>2</sub>), 5.26 (d, *J* = 2.8 Hz, 1H, CH), 6.97-7.15 (m, 3H, H-Aro), 7.89 (s, 1H, NH), 9.55 (s, 1H, NH). <sup>13</sup>C NMR (100 MHz, DMSO-d<sub>6</sub>): δ 15.8, 21.0, 50.8, 56.3, 56.8, 60.6, 100.6, 122.7, 128.9, 130.9, 136.8, 139.7, 144.9, 150.9, 154.4, 166.8.

**3,4-Dihydro-5-etoxy-carbonyl-4-(3-methoxy-4-hydroxyphenyl)-6-methyl-pyrimidine-2(1H)-one (4p):** Whitepowder; mp 177-179 °C (lit. 173-175°C). <sup>1</sup>H NMR (400 MHz, DMSO-d<sub>6</sub>): δ 2.27 (s, 3H, CH<sub>3</sub>), 3.55 (s, 3H, CH<sub>3</sub>), 3.76 (s, 3H, CH<sub>3</sub>), 3.99 (q, *J* = 8.0 Hz, 2H, CH<sub>2</sub>), 5.06 (d, *J* = 2.8 Hz, 1H, CH), 6.73-6.86 (m, 3H, H-Aro), 7.82 (s, 1H, NH), 8.22 (s, 1H, NH). <sup>13</sup>C NMR (100 MHz, DMSO-d<sub>6</sub>): δ 15.2, 18.9, 51.8, 56.8, 60.8, 100.3, 121.7, 128.9, 132.9, 136.7, 139.9, 144.9, 150.9, 152.1, 166.7.

**3,4-Dihydro-5-etoxy-carbonyl-4-(4-trifluoromethylphenyl)-6-methyl-pyrimidine-2(1H)-one (4q):** Whitepowder; mp 177-179 °C (lit. 173-175 °C). <sup>1</sup>H NMR (400 MHz, DMSO-d<sub>6</sub>): δ 0.96 (t, *J* = 7.6 Hz, 3H, CH<sub>3</sub>), 2.51 (s, 3H, CH<sub>3</sub>), 3.89 (q, *J* = 7.6 Hz, 2H, CH<sub>2</sub>), 5.52 (d, *J* = 2.8 Hz, 1H, CH), 7.27 (d, *J* = 7.6 Hz, 2H, H-Aro), 7.47 (d, *J* = 7.6 Hz, 2H, H-Aro), 7.58 (s, 1H, NH), 9.39 (s, 1H, NH). <sup>13</sup>C NMR (100 MHz, DMSO-d<sub>6</sub>): δ 15.2, 18.9, 54.1, 60.1, 99.7, 118.0, 122.3, 129.2, 132.1, 144.1, 147.1, 152.9, 165.8.

**3,4-Dihydro-5-etoxy-carbonyl-4-(2-hydroxyphenyl)-6-methyl-pyrimidine-2(1H)-one (4r):** Whitepowder; mp 198-200 °C (lit. 199-201°C). <sup>1</sup>H NMR (400 MHz, DMSO-d<sub>6</sub>): δ 1.07 (t, *J* = 7.6 Hz, 3H, CH<sub>3</sub>), 2.35 (s, 3H, CH<sub>3</sub>), 4.07 (q, *J* = 7.6 Hz, 2H, CH<sub>2</sub>), 5.55 (s, 1H, CH), 6.91-7.15 (m, 4H, H-Aro), 7.58 (s, 1H, NH), 9.35 (s, 1H, NH), 9.75 (s, 1H, OH). <sup>13</sup>C NMR (100 MHz, DMSO-d<sub>6</sub>): δ 14.5, 17.4, 55.8, 60.6, 100.6, 112.9, 121.8, 129.5, 131.7, 133.3, 151.9, 156.9, 159.0, 167.4.

**3,4-Dihydro-5-etoxy-carbonyl-4-(4-hydroxyphenyl)-6-methyl-pyrimidine-2(1H)-one (4s):** Whitepowder; mp 229-231 °C (lit. 231-233°C). <sup>1</sup>H NMR (400 MHz, DMSO-d<sub>6</sub>): δ 1.15 (t, *J* = 7.6 Hz, 3H, CH<sub>3</sub>), 2.35 (s, 3H, CH<sub>3</sub>), 4.02 (q, *J* = 7.6 Hz, 2H, CH<sub>2</sub>), 5.09 (s, 1H, CH), 6.83 (d, *J* = 7.6 Hz, 2H, H-Aro), 7.11 (d, *J* = 7.6 Hz, 2H, H-Aro), 7.85 (s, 1H, NH), 9.52 (s, 1H, NH), 9.74 (s, 1H, OH). <sup>13</sup>C NMR (100 MHz, DMSO-d<sub>6</sub>): δ 14.7, 18.3, 54.4, 60.3, 100.8, 115.5, 129.1, 138.3, 148.3, 153.9, 156.0, 166.7.

**3,4-Dihydro-5-etoxy-carbonyl-4-(4-p-tolyl)-6-methyl-pyrimidine-2(1H)-one (4t):** Whitepowder; mp 215-216 °C (lit. 216-217 °C). <sup>1</sup>H NMR (400 MHz, DMSO-d<sub>6</sub>): δ 1.16 (t, *J* = 7.6 Hz, 3H, CH<sub>3</sub>), 2.32 (s, 3H, CH<sub>3</sub>), 2.30 (s, 3H,

CH<sub>3</sub>), 4.07 (m, 2H, CH<sub>2</sub>), 5.33(s, 1H, CH), 6.29 (s, 1H, NH), 6.87(d, *J*= 8.0 Hz, 2H, H-Aro), 7.17 (d, *J*= 7.6 Hz, 2H, H-Aro), 8.74 (s, 1H, NH). <sup>13</sup>C NMR (100 MHz, DMSO-d<sub>6</sub>): δ 14.8, 18.8, 22.8, 56.6, 66.7, 100.2, 115.0, 127.1, 138.7, 149.3, 155.4, 158.5, 166.3.

**3,4-Dihydro-5-etoxy-carbonyl-4-(4-styryl)-6-methyl-pyrimidine-2(1H)-one (4u):** White powder; mp 227-229 °C (lit. 234-236°C). <sup>1</sup>H NMR (400 MHz, DMSO-d<sub>6</sub>): δ 1.15 (t, *J*= 7.6 Hz, 3H, CH<sub>3</sub>), 2.33 (s, 3H, CH<sub>3</sub>), 3.96 (q, *J*= 7.6 Hz, 2H, CH<sub>2</sub>), 5.05(d, *J*= 2.8 Hz, 1H, CH), 7.20-7.39 (m, 7H, H-Aro), 7.38 (s, 1H, NH), 9.28 (s, 1H, NH). <sup>13</sup>C NMR (100 MHz, DMSO-d<sub>6</sub>): δ 15.0, 20.6, 54.3, 61.1, 100.1, 112.8, 112.9, 113.9, 126.91, 126.95, 134.3, 148.7, 154.7, 160.1, 163.8, 166.8.

**3,4-Dihydro-5-etoxy-carbonyl-4-(2-furyl)-6-methyl-pyrimidine-2(1H)-one (4v):** White powder; mp 204-206 °C (lit. 205-207°C). <sup>1</sup>H NMR (400 MHz, DMSO-d<sub>6</sub>): δ 1.16 (t, *J*= 8.0 Hz, 3H, CH<sub>3</sub>), 2.50 (s, 3H, CH<sub>3</sub>), 4.07 (q, *J*= 8.0 Hz, 2H, CH<sub>2</sub>), 5.20(d, *J*= 2.8 Hz, 1H, CH), 6.18 (d, *J*= 2.8 Hz, 1H, CH), 6.25 (s, 1H, CH), 7.11 (s, 1H, CH), 7.41 (s, 1H, NH), 9.10 (s, 1H, NH). <sup>13</sup>C NMR (100 MHz, DMSO-d<sub>6</sub>): δ 14.4, 19.5, 44.4, 60.6, 98.4, 106.5, 113.7, 138.4, 150.9, 153.9, 156.8, 167.5.

# <sup>1</sup>H and <sup>13</sup>C NMR spectra of all compounds

The <sup>1</sup>H NMR spectrum of 3,4-Dihydro-5-etoxy-carbonyl-4-(4-phenyl)-6-methyl-pyrimidine-2(1H)-one (4a):

Sample code: abb 20

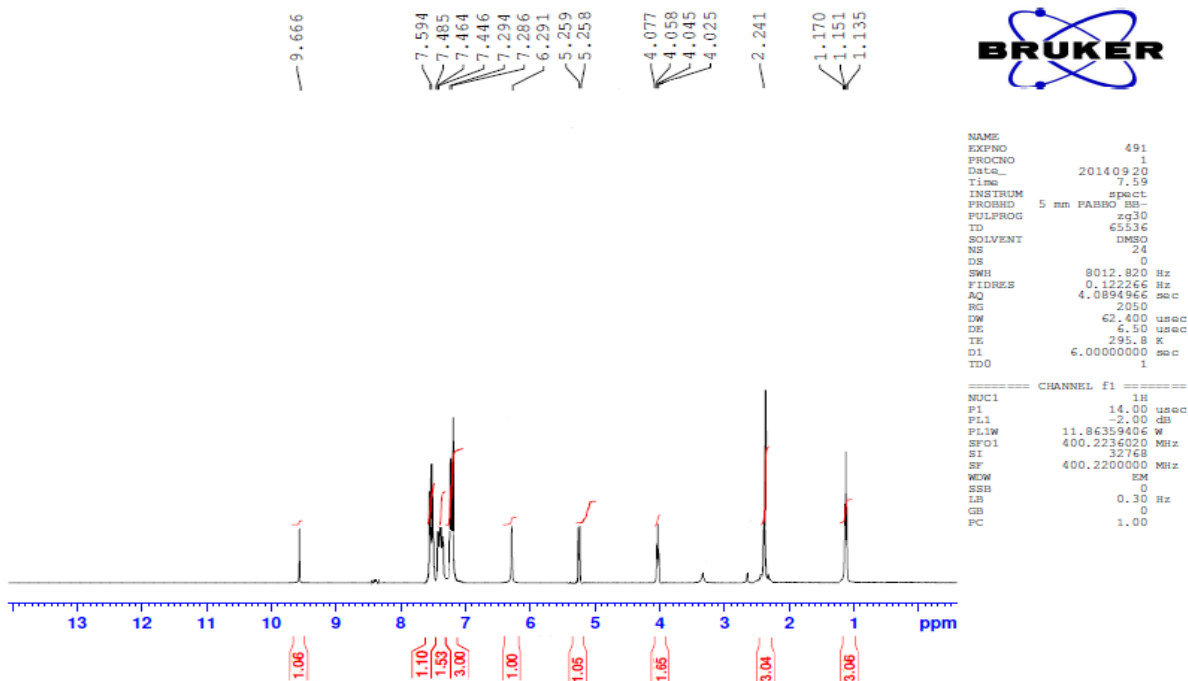

The <sup>13</sup>C NMR spectrum of 3,4-Dihydro-5-etoxy-carbonyl-4-(4-phenyl)-6-methyl-pyrimidine-2(1H)-one (4a):

Sample code: abb 20

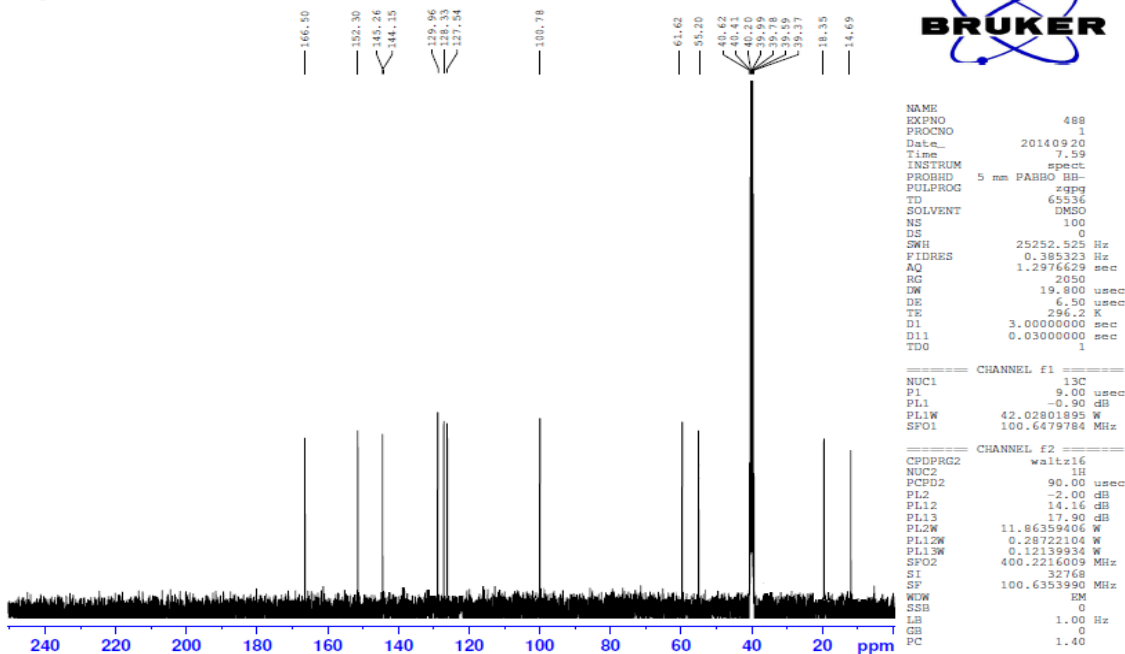

The <sup>1</sup>H NMR spectrum of 3,4-Dihydro-5-etoxy carbonyl-4-(2-chlorophenyl)-6-methyl-pyrimidine-2(1H)-one (4b):

Sample code:abb4

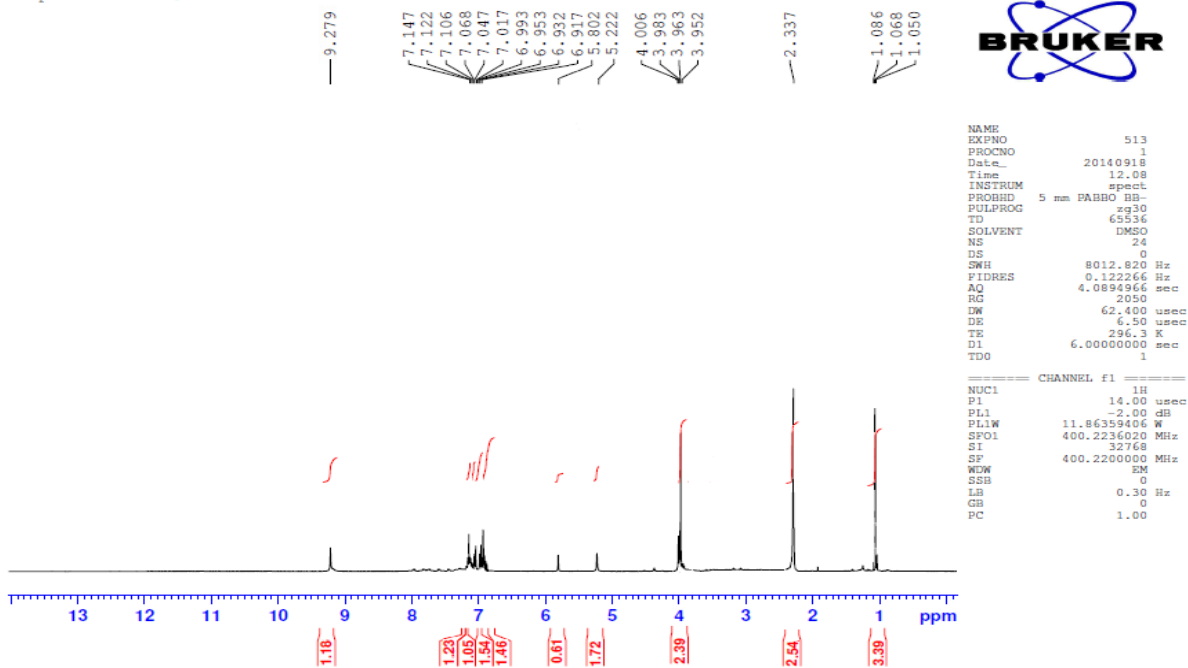

The <sup>13</sup>C NMR spectrum of 3,4-Dihydro-5-etoxy carbonyl-4-(2-chlorophenyl)-6-methyl-pyrimidine-2(1H)-one (4b):

Sample code:abb4

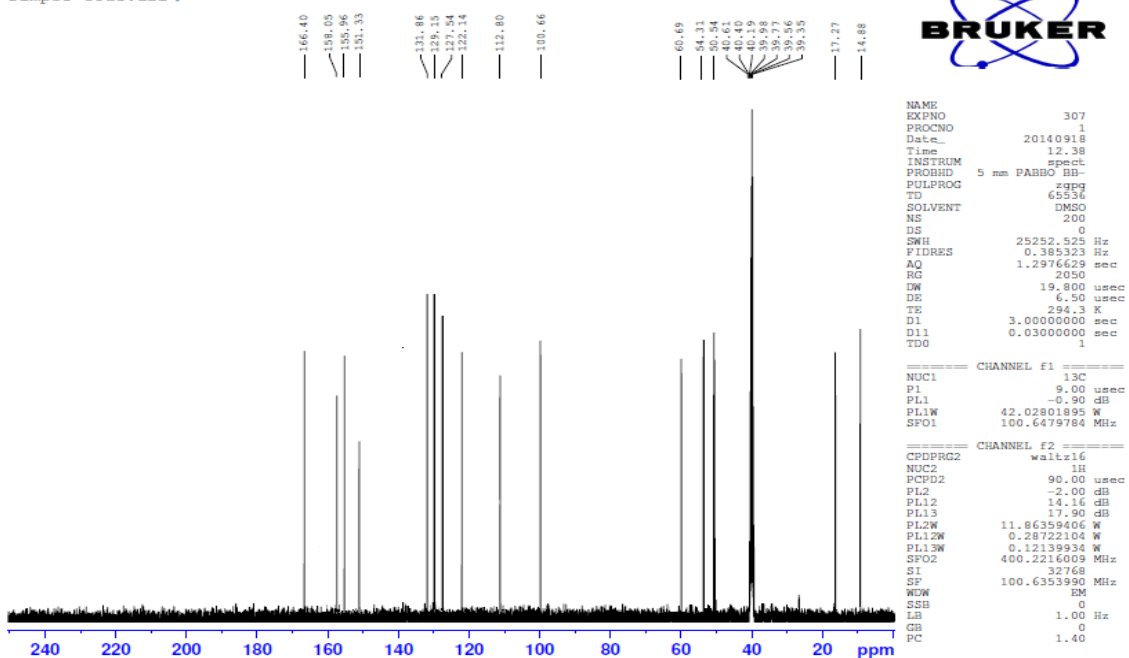

The <sup>1</sup>H NMR spectrum of 3,4-Dihydro-5-etoxy carbonyl-4-(3-chlorophenyl)-6-methyl-pyrimidine-2(1H)-one (4c):

Sample code: abb 6

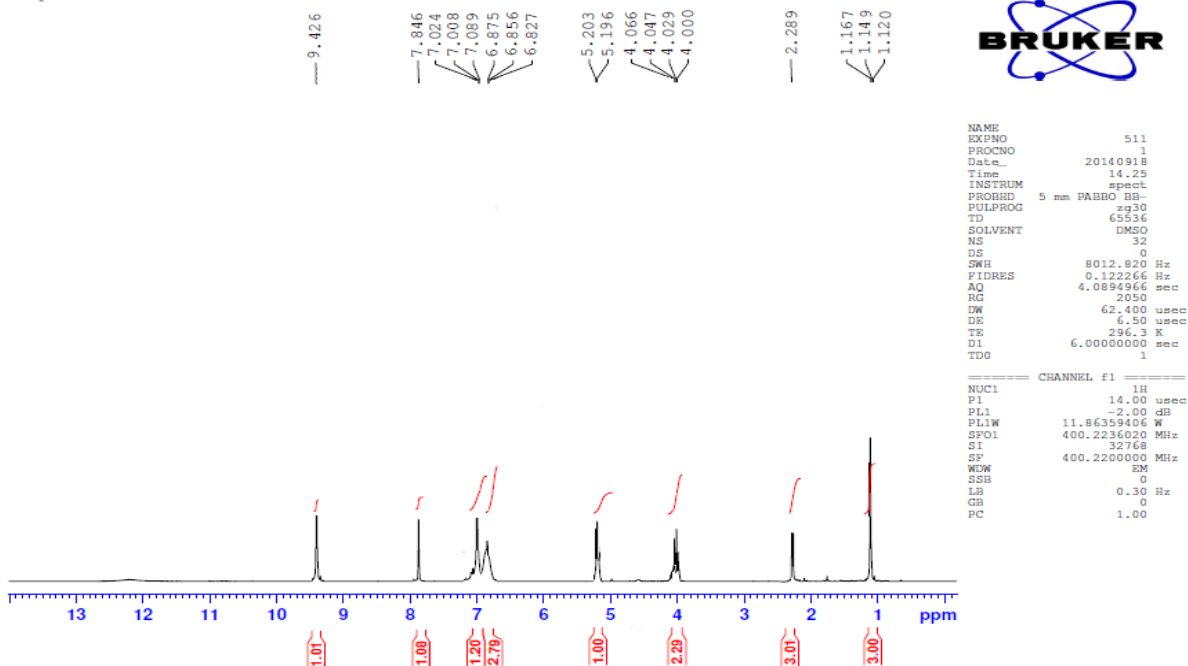

The <sup>13</sup>C NMR spectrum of 3,4-Dihydro-5-etoxy carbonyl-4-(3-chlorophenyl)-6-methyl-pyrimidine-2(1H)-one (4c):

Sample code: abb 6

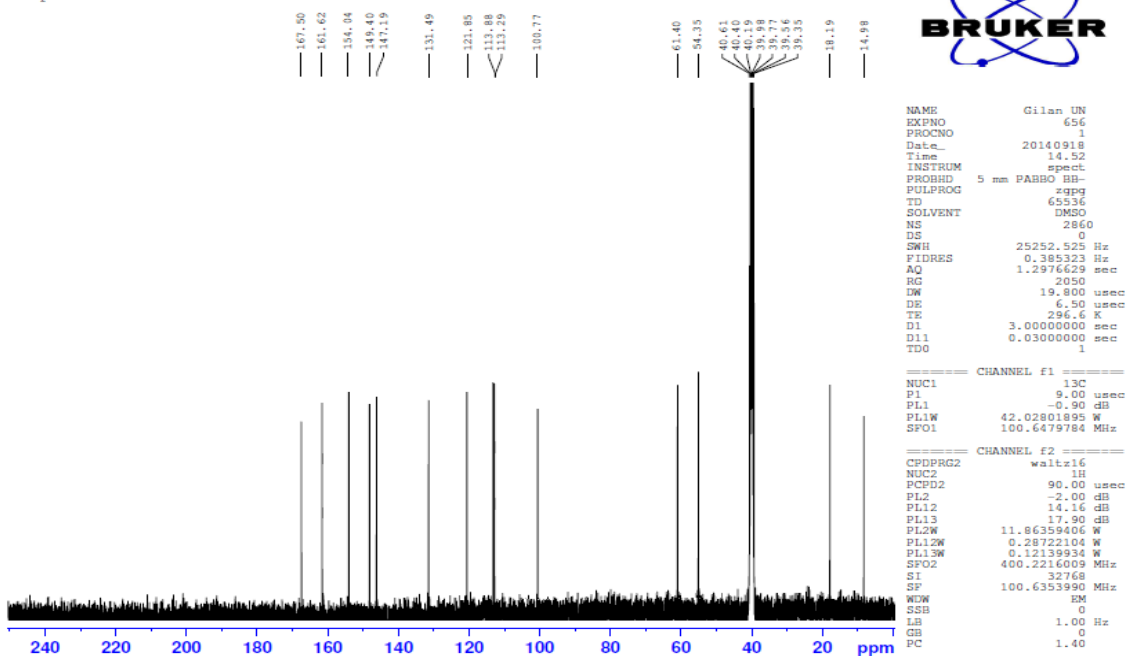

The <sup>1</sup>H NMR spectrum of 3,4-Dihydro-5-etoxy-carbonyl-4-(4-chlorophenyl)-6-methyl-pyrimidine-2(1H)-one (4d):

Sample code:abb7

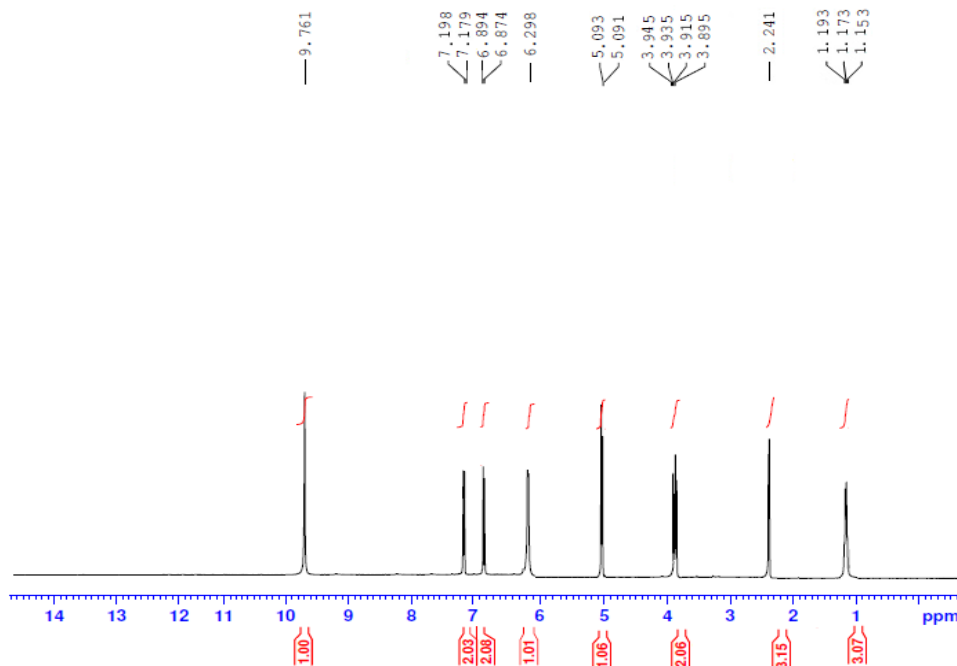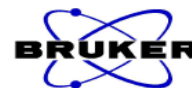

```

NAME          308
EXPNO         1
PROCNO        1
Date_         20140918
Time         18.35
INSTRUM       spect
PROBHD        5 mm PABBO BB-
PULPROG       zg30
TD            65536
SOLVENT       DMSO
NS            20
DS            0
SWH           8012.820 Hz
FIDRES        0.122266 Hz
AQ            4.0894966 sec
RG            1290
DW            62.400 usec
DE            6.50 usec
TE            294.3 K
D1            6.0000000 sec
D11           1
TDO           1
    
```

```

===== CHANNEL f1 =====
NUC1          1H
P1            14.00 usec
PL1          -2.00 dB
PL1W         11.86359406 W
SFO1         400.2236020 MHz
SI           32768
SF           400.2200000 MHz
WDW           EM
SSB           0
LB           0.30 Hz
GB           0
PC           1.00
    
```

The <sup>13</sup>C NMR spectrum of 3,4-Dihydro-5-etoxy-carbonyl-4-(4-chlorophenyl)-6-methyl-pyrimidine-2(1H)-one (4d):

Sample code:abb7

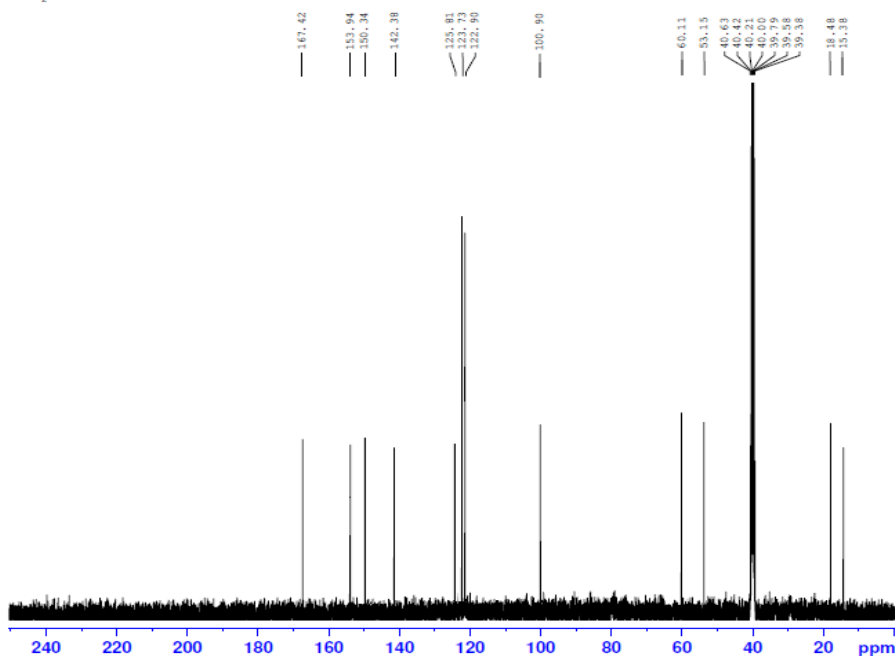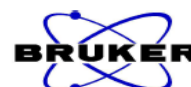

```

NAME          484
EXPNO         1
PROCNO        1
Date_         20140918
Time         19.09
INSTRUM       spect
PROBHD        5 mm PABBO BB-
PULPROG       zgpg
TD            65536
SOLVENT       DMSO
NS            200
DS            0
SWH           25252.525 Hz
FIDRES        0.385323 Hz
AQ            1.2976629 sec
RG            2050
DW            19.800 usec
DE            6.50 usec
TE            297.1 K
D1            3.0000000 sec
D11           0.030000000 sec
TDO           1
    
```

```

===== CHANNEL f1 =====
NUC1          13C
P1            9.00 usec
PL1          -0.90 dB
PL1W         42.02801895 W
SFO1         100.6479784 MHz
    
```

```

===== CHANNEL f2 =====
CPDPRG2      waltz16
NUC2          1H
PCPD2        90.00 usec
PL2          -2.00 dB
PL12         14.16 dB
PL13         17.90 dB
PL2W         11.86359406 W
PL12W        0.28722104 W
PL13W        0.12139934 W
SFO2         400.2216009 MHz
SI           32768
SF           100.6353990 MHz
WDW           EM
SSB           0
LB           1.00 Hz
GB           0
PC           1.40
    
```



The <sup>1</sup>H NMR spectrum of 3,4-Dihydro-5-etoxy-carbonyl-4-(3-bromophenyl)-6-methyl-pyrimidine-2(1H)-one (4e):

Sample code: (abbaspour1)

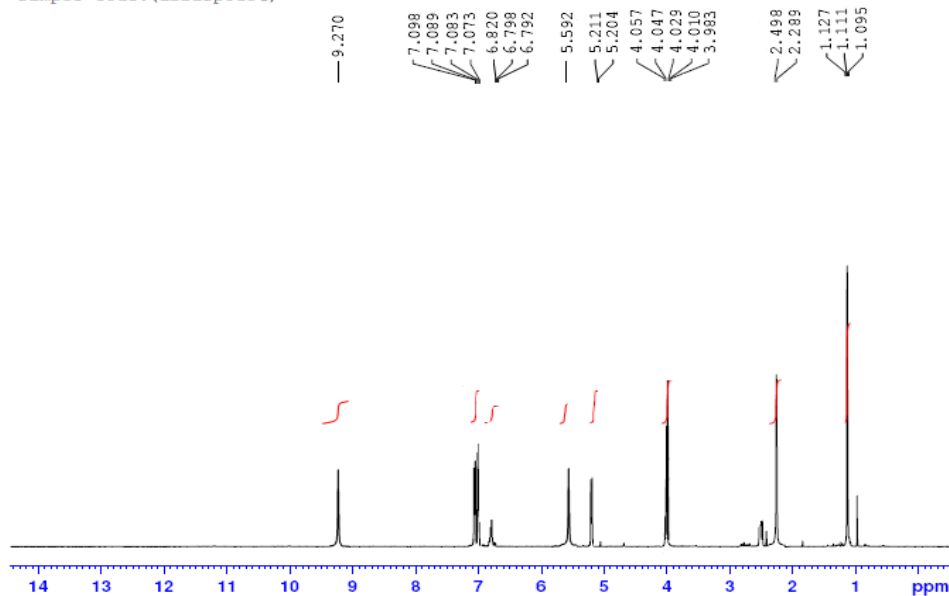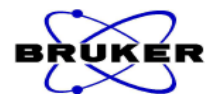

```

NAME          511
EXPNO         1
PROCNO        1
Date_         20140318
Time         11.55
INSTRUM       spect
PROBHD        5 mm PABBO BB-
PULPROG       zg30
TD            65536
SOLVENT       DMSO
NS            32
DS            0
SWH           8012.820 Hz
FIDRES        0.122266 Hz
AQ            4.0894966 sec
RG            2050
DW            62.400 usec
DE            6.50 usec
TE            296.3 K
D1            6.0000000 sec
TD0           1
===== CHANNEL f1 =====
NUC1          1H
P1            14.00 usec
PL1           -2.00 dB
PL1W          11.86359406 MHz
SFO1          400.2236020 MHz
SI            32768
SF            400.2200000 MHz
WDW           EM
SSB           0
LB            0.30 Hz
GB            0
PC            1.00
    
```

The <sup>13</sup>C NMR spectrum of 3,4-Dihydro-5-etoxy-carbonyl-4-(3-bromophenyl)-6-methyl-pyrimidine-2(1H)-one (4e):

Sample code: (abbaspour2)

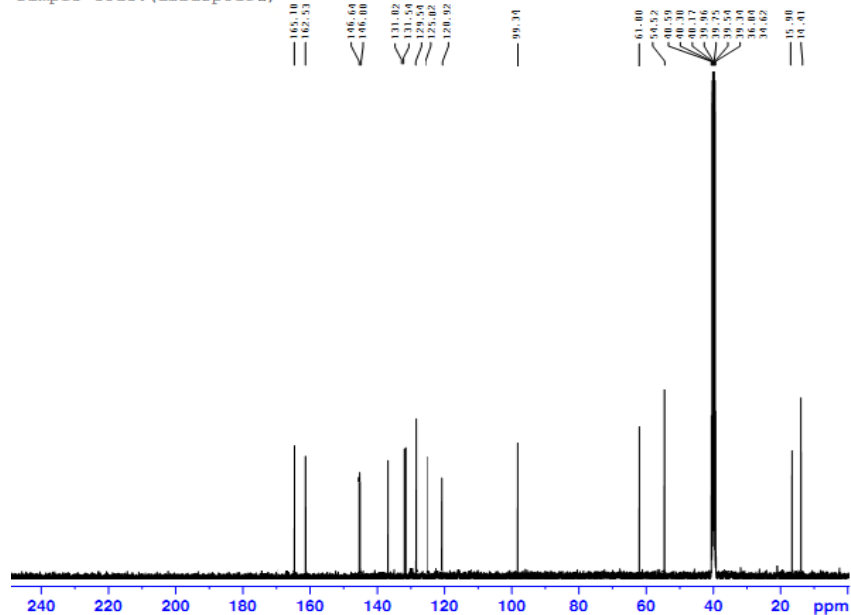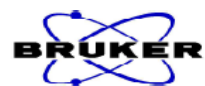

```

NAME          328
EXPNO         1
PROCNO        1
Date_         20140318
Time         17.14
INSTRUM       spect
PROBHD        5 mm PABBO BB-
PULPROG       zgpg
TD            65536
SOLVENT       DMSO
NS            66
DS            0
SWH           25252.528 Hz
FIDRES        0.385323 Hz
AQ            1.2976529 sec
RG            2050
DW            19.800 usec
DE            6.50 usec
TE            293.4 K
D1            3.0000000 sec
D11           0.5000000 sec
TD0           1
===== CHANNEL f1 =====
NUC1          13C
P1            9.00 usec
PL1           -0.90 dB
PL1W          42.02801895 MHz
SFO1          100.6479784 MHz
===== CHANNEL f2 =====
ENDPRG2       wait16
NUC2          1H
PCPDZ         90.00 usec
PL2           -2.00 dB
PL12          12.14 dB
PL13          17.90 dB
PL12W         11.86359406 MHz
SFO2          400.2216009 MHz
SI            32768
SF            400.6453490 MHz
WDW           EM
SSB           0
LB            1.00 Hz
GB            0
PC            1.40
    
```

The <sup>1</sup>H NMR spectrum of 3,4-Dihydro-5-etoxy carbonyl-4-(2,4-dichlorophenyl)-6-methyl-pyrimidine-2(1H)-one (4f):

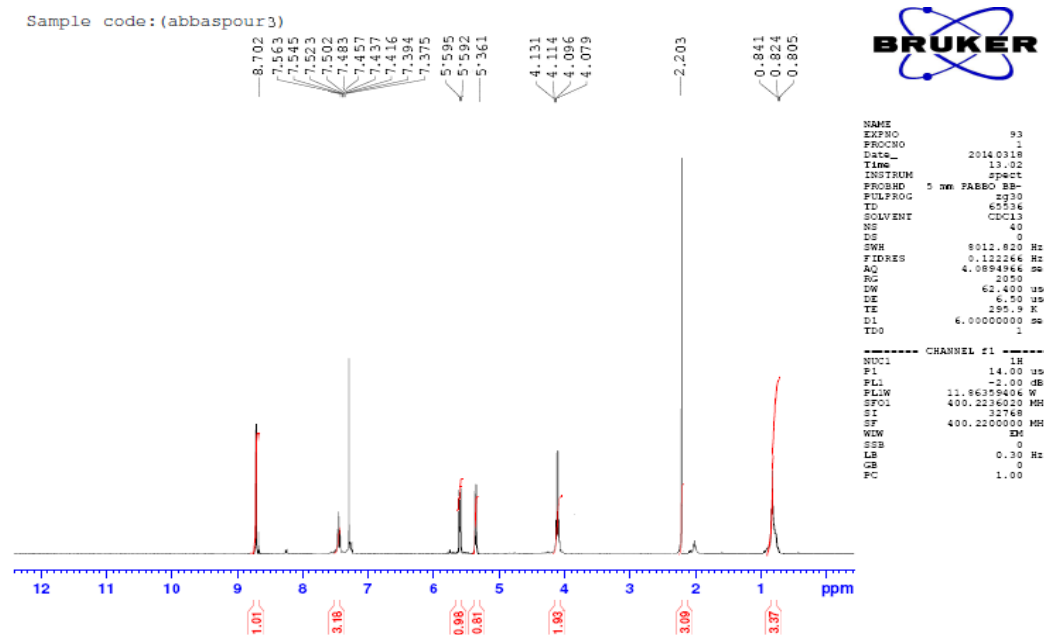

The <sup>13</sup>C NMR spectrum of 3,4-Dihydro-5-etoxy carbonyl-4-(2,4-dichlorophenyl)-6-methyl-pyrimidine-2(1H)-one (4f):

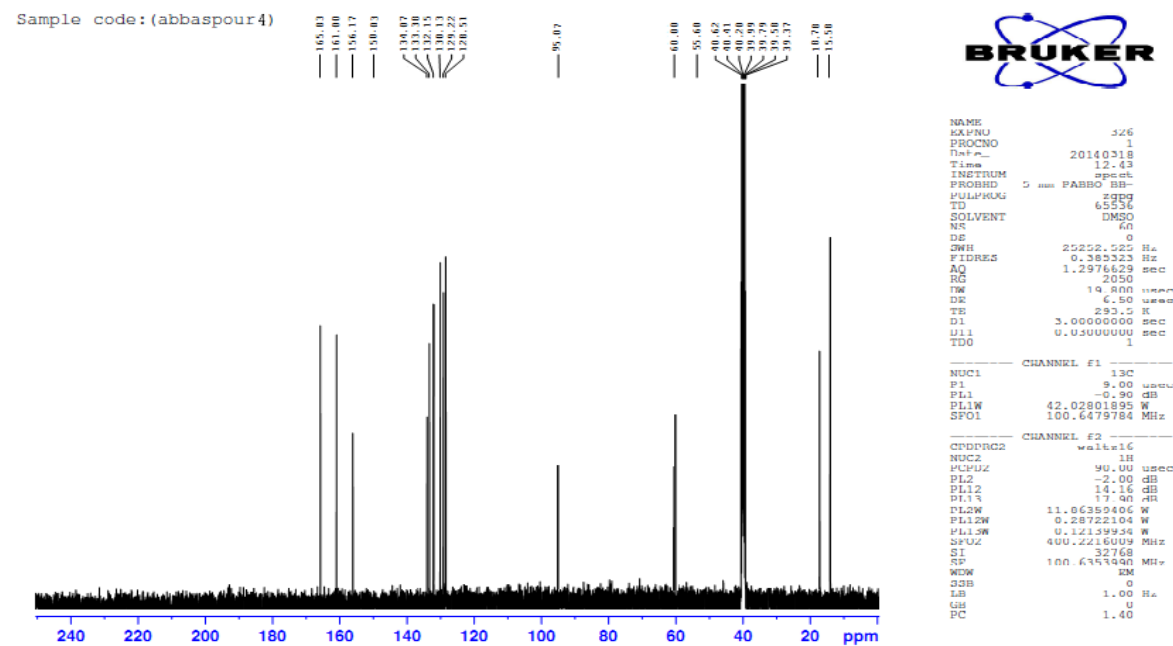

The <sup>1</sup>H NMR spectrum of 3,4-Dihydro-5-etoxy carbonyl-4-(3,4-dichlorophenyl)-6-methyl-pyrimidine-2(1H)-one (4g):

Sample code:abb5

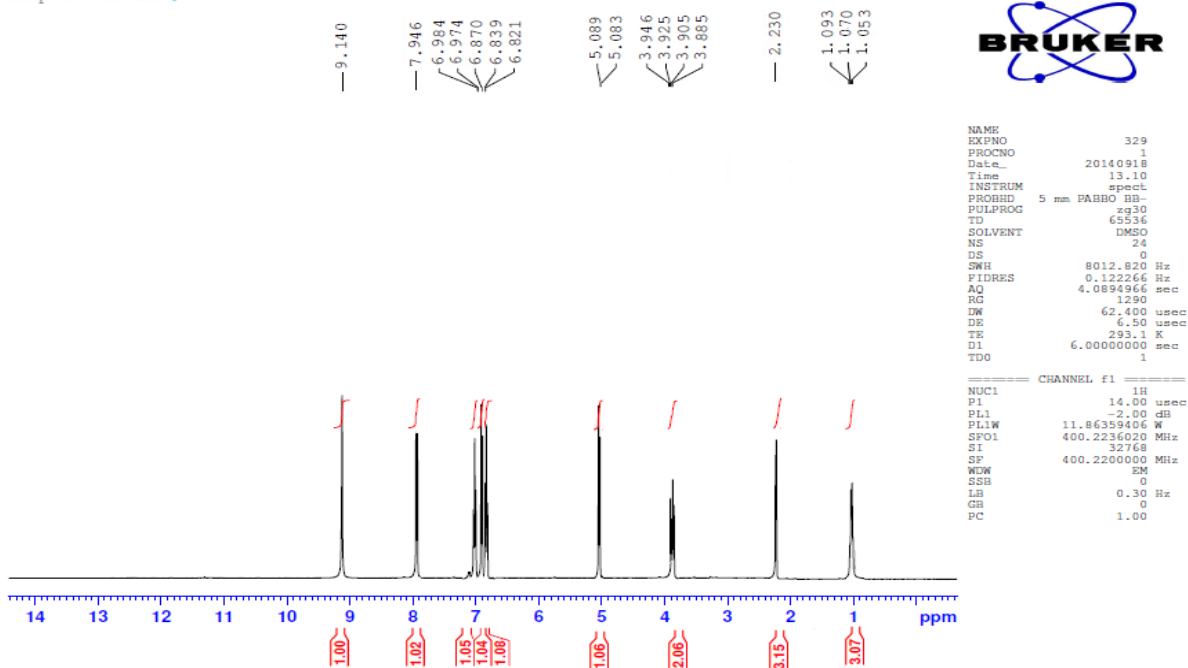

The <sup>13</sup>C NMR spectrum of 3,4-Dihydro-5-etoxy carbonyl-4-(3,4-dichlorophenyl)-6-methyl-pyrimidine-2(1H)-one (4g):

Sample code:abb5

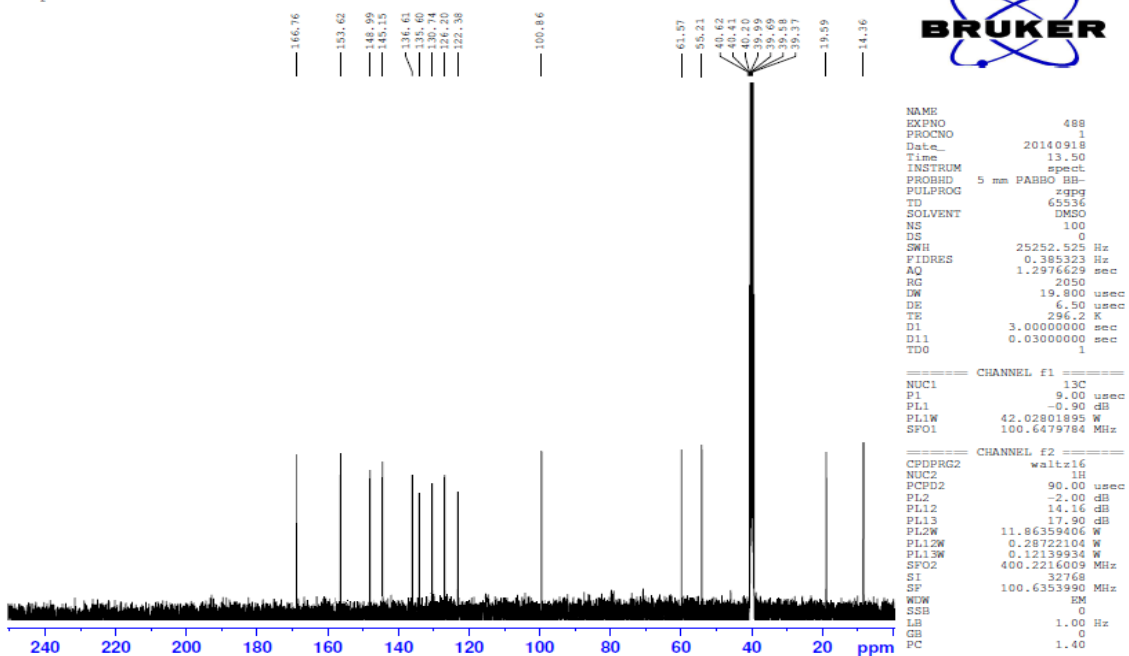

The <sup>1</sup>H NMR spectrum of 3,4-Dihydro-5-etoxy-carbonyl-4-(4-fluorophenyl)-6-methyl-pyrimidine-2(1H)-one (4h):

Sample code: abb 8

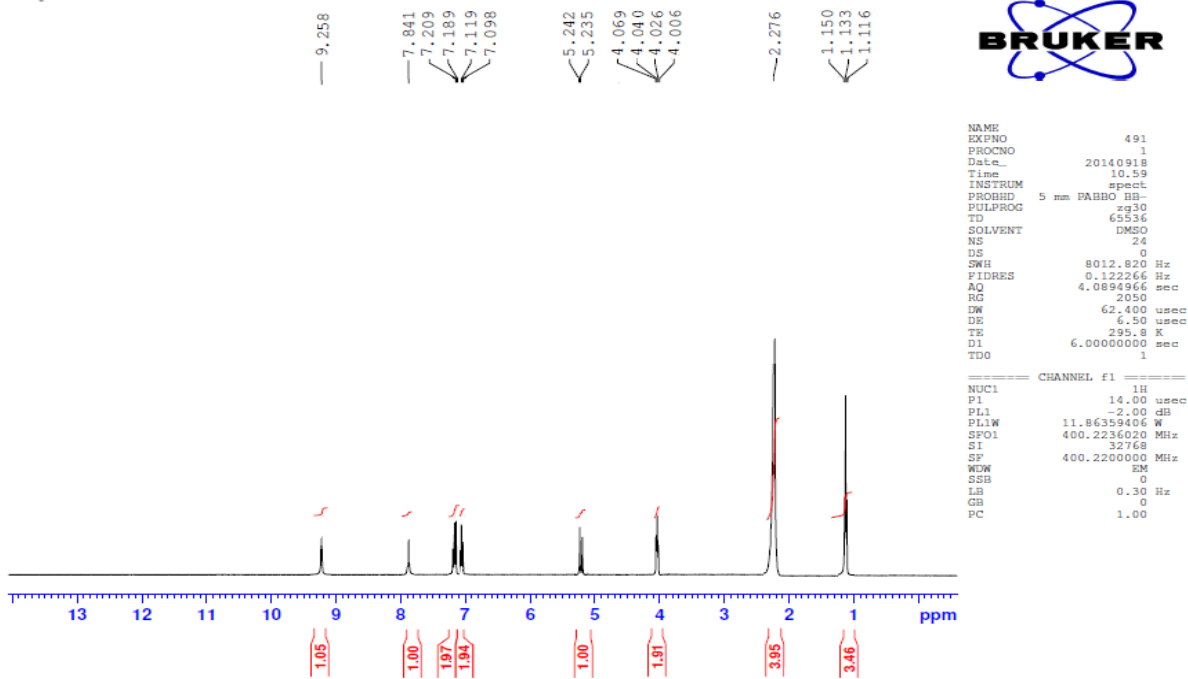

The <sup>13</sup>C NMR spectrum of 3,4-Dihydro-5-etoxy-carbonyl-4-(4-fluorophenyl)-6-methyl-pyrimidine-2(1H)-one (4h):

Sample code: abb 8

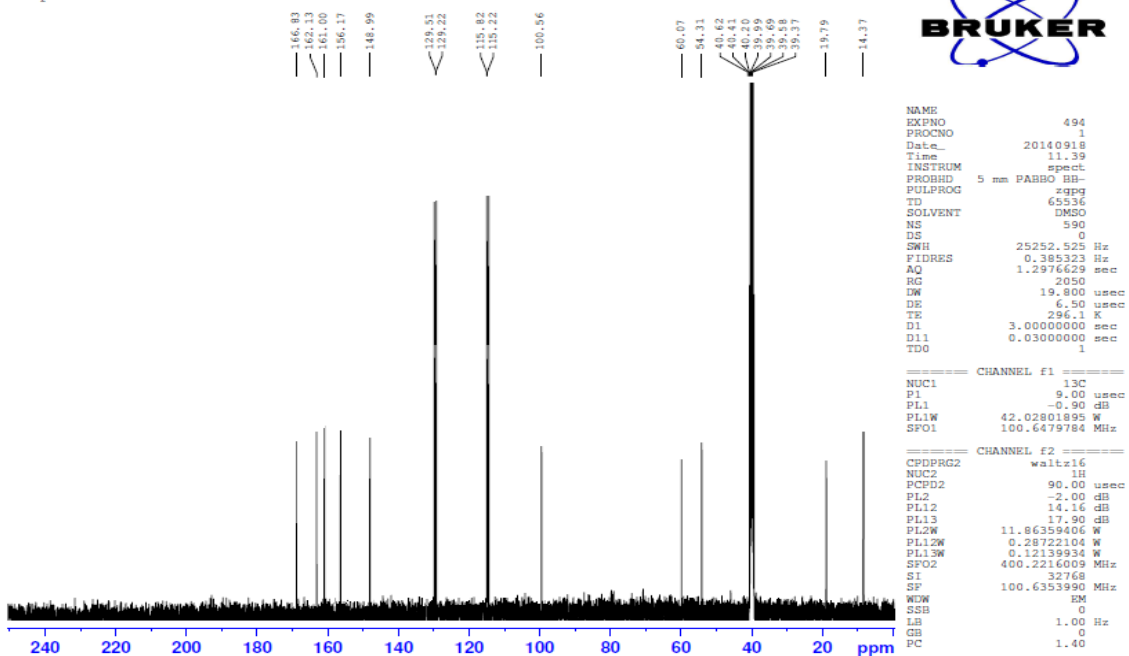

The <sup>1</sup>H NMR spectrum of 3,4-Dihydro-5-etoxy-carbonyl-4-(2-nitrophenyl)-6-methyl-pyrimidine-2(1H)-one (4i):

Sample code:abb9

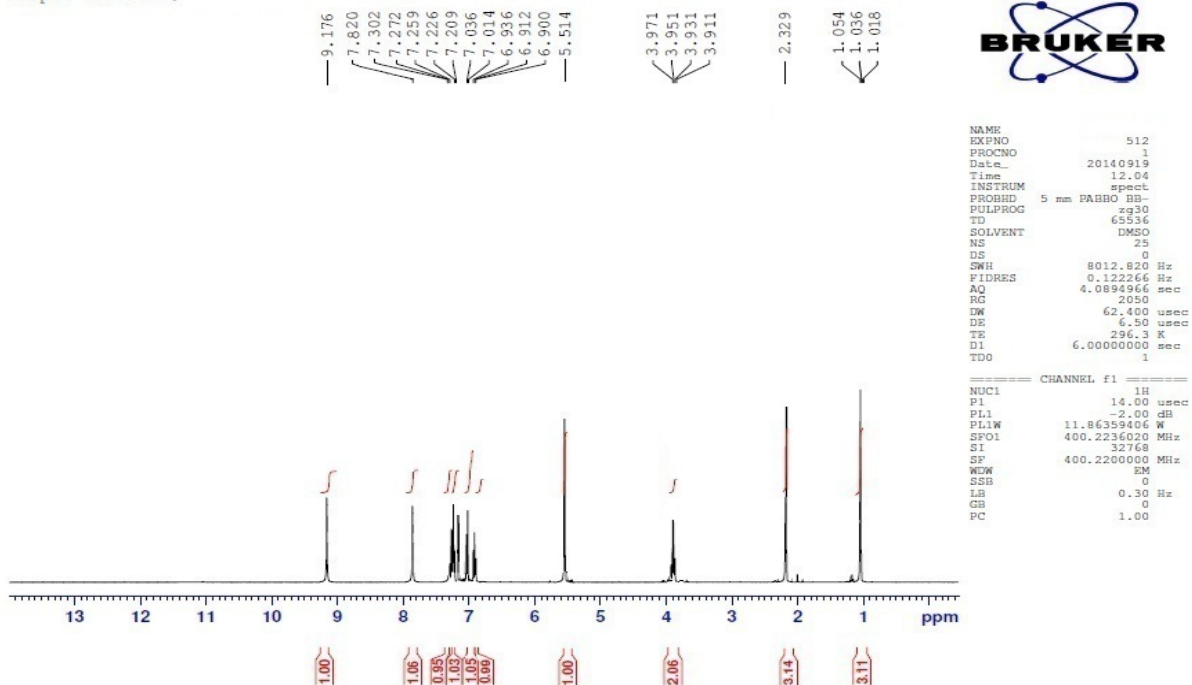

The <sup>13</sup>C NMR spectrum of 3,4-Dihydro-5-etoxy-carbonyl-4-(2-nitrophenyl)-6-methyl-pyrimidine-2(1H)-one (4i):

Sample code:abb9

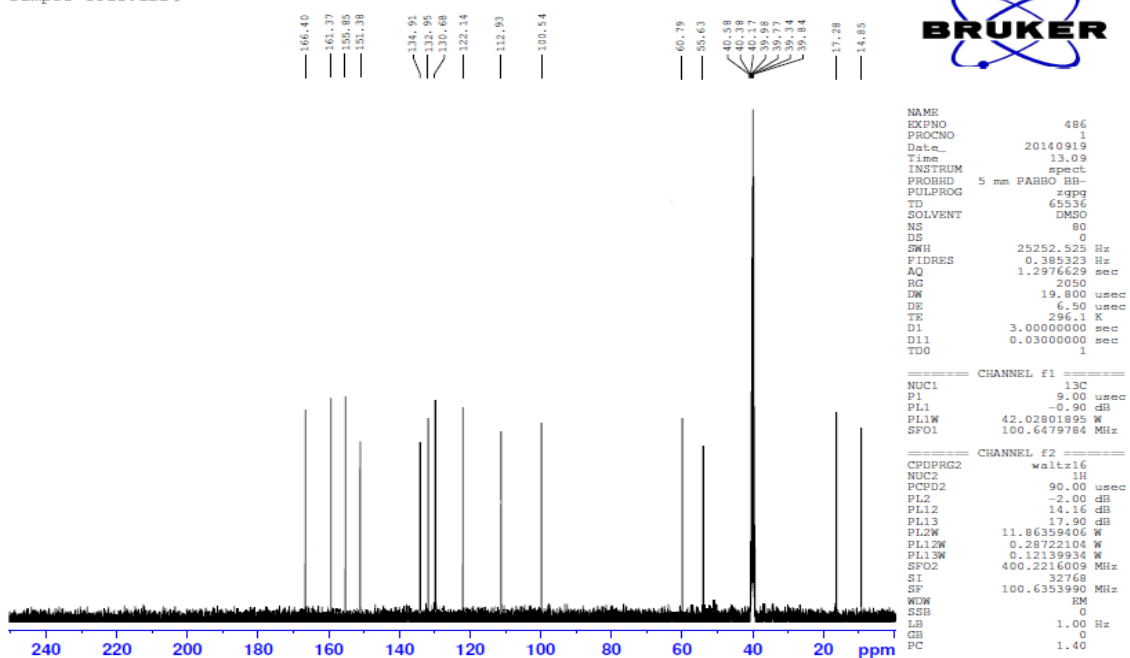

The <sup>1</sup>H NMR spectrum of 3,4-Dihydro-5-etoxy-carbonyl-4-(3-nitrophenyl)-6-methyl-pyrimidine-2(1H)-one (4j):

Sample code:abb10

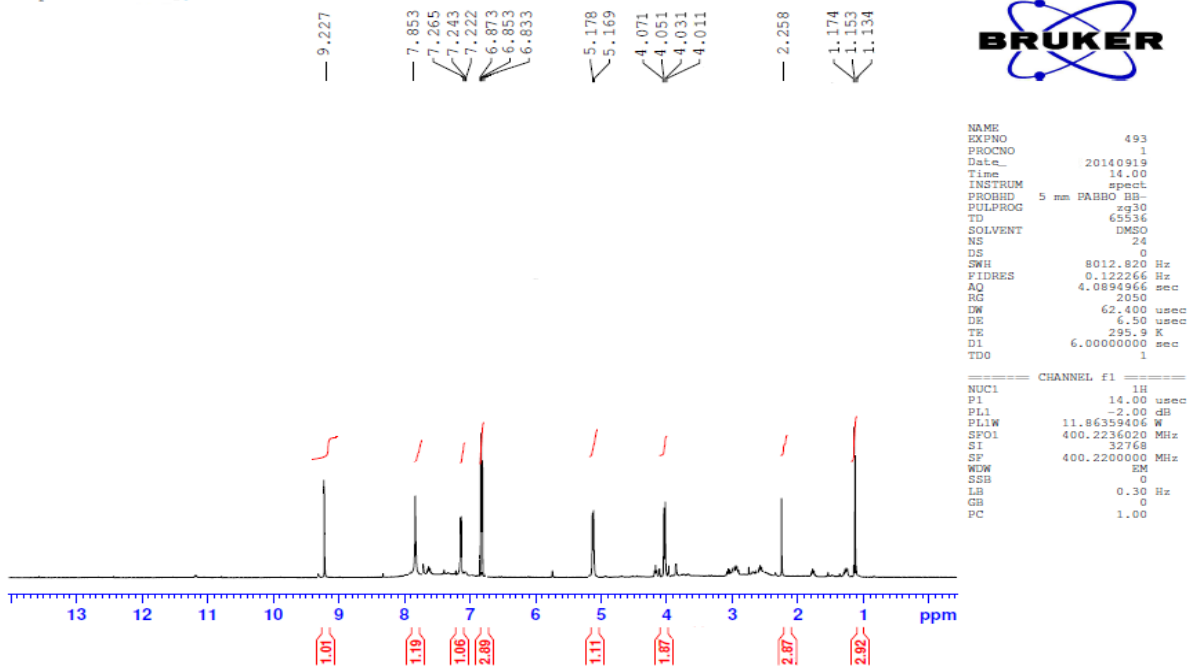

The <sup>13</sup>C NMR spectrum of 3,4-Dihydro-5-etoxy-carbonyl-4-(3-nitrophenyl)-6-methyl-pyrimidine-2(1H)-one (4j):

Sample code:abb10

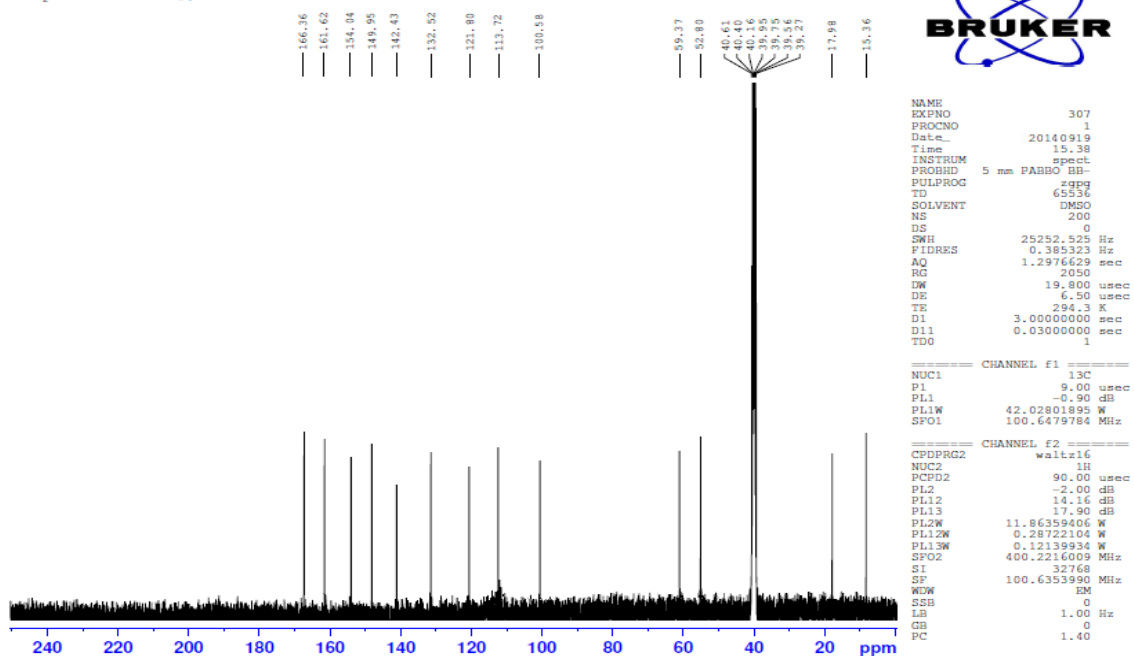

The <sup>1</sup>H NMR spectrum of 3,4-Dihydro-5-etoxy-carbonyl-4-(4-nitrophenyl)-6-methyl-pyrimidine-2(1H)-one (4k):

Sample code:abb11

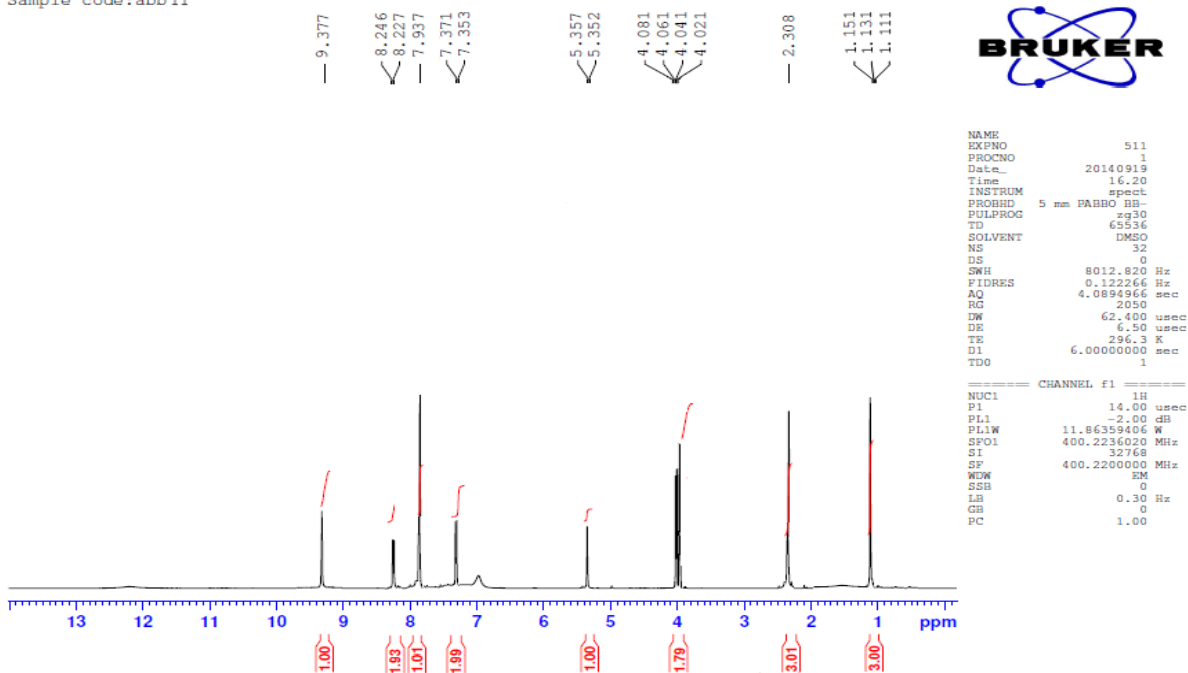

The <sup>13</sup>C NMR spectrum of 3,4-Dihydro-5-etoxy-carbonyl-4-(4-nitrophenyl)-6-methyl-pyrimidine-2(1H)-one (4k):

Sample code:abb11

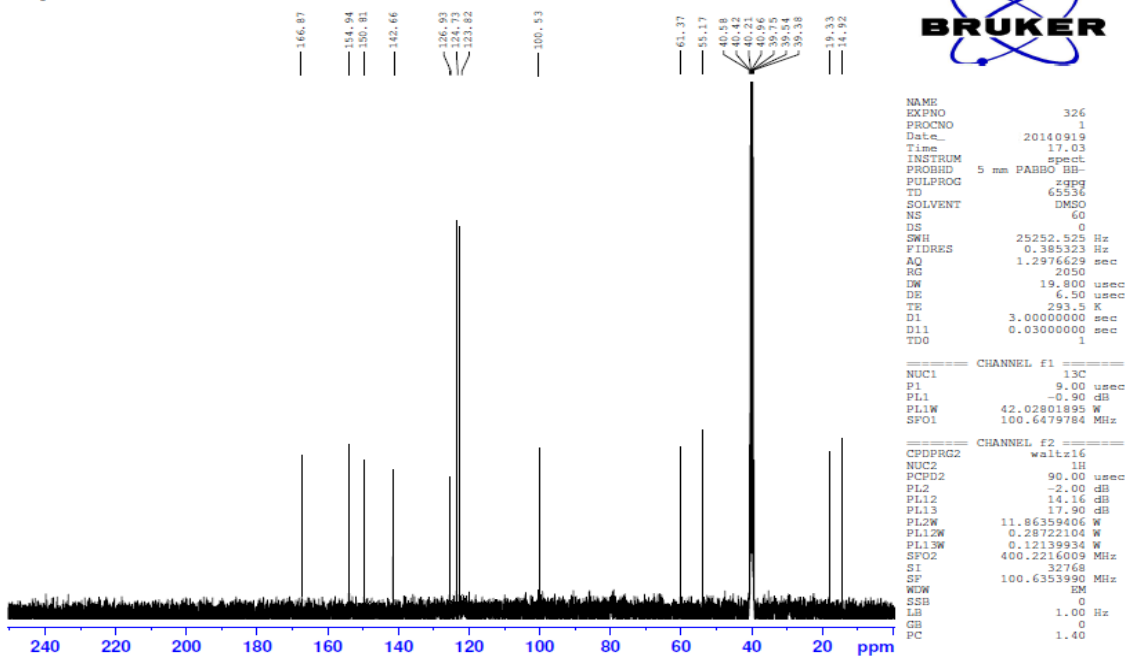

The <sup>1</sup>H NMR spectrum of 3,4-Dihydro-5-etoxy-carbonyl-4-(2-methoxyphenyl)-6-methyl-pyrimidine-2(1H)-one (4l):

Sample code: abb14

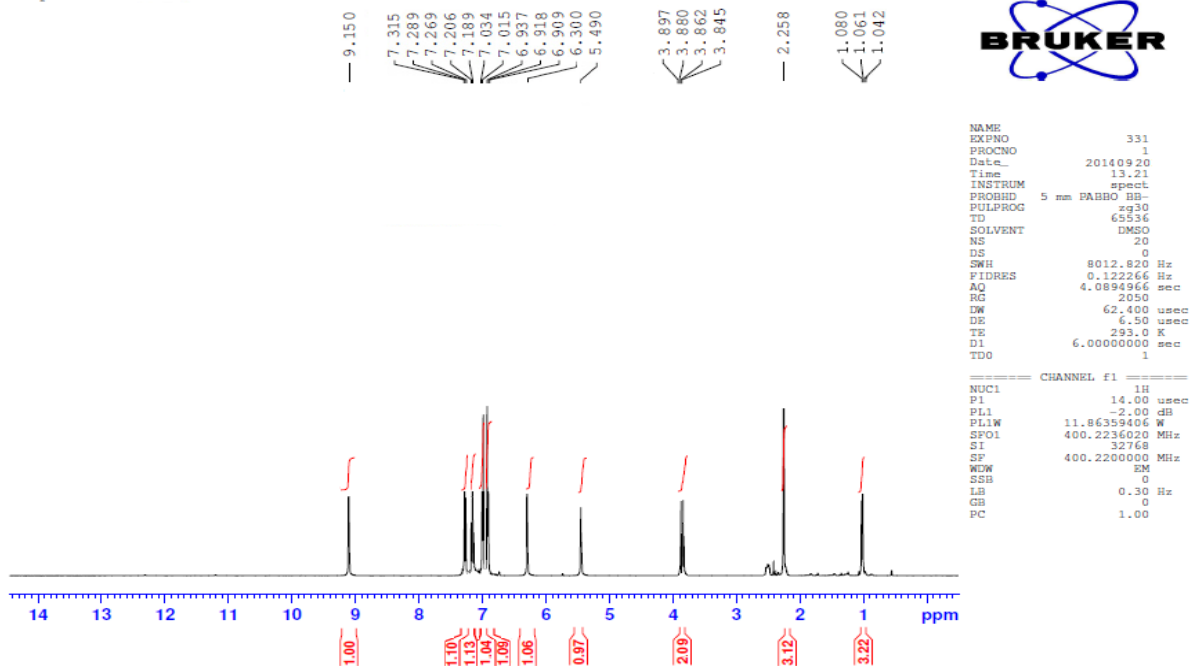

The <sup>13</sup>C NMR spectrum of 3,4-Dihydro-5-etoxy-carbonyl-4-(2-methoxyphenyl)-6-methyl-pyrimidine-2(1H)-one (4l):

Sample code: abb14

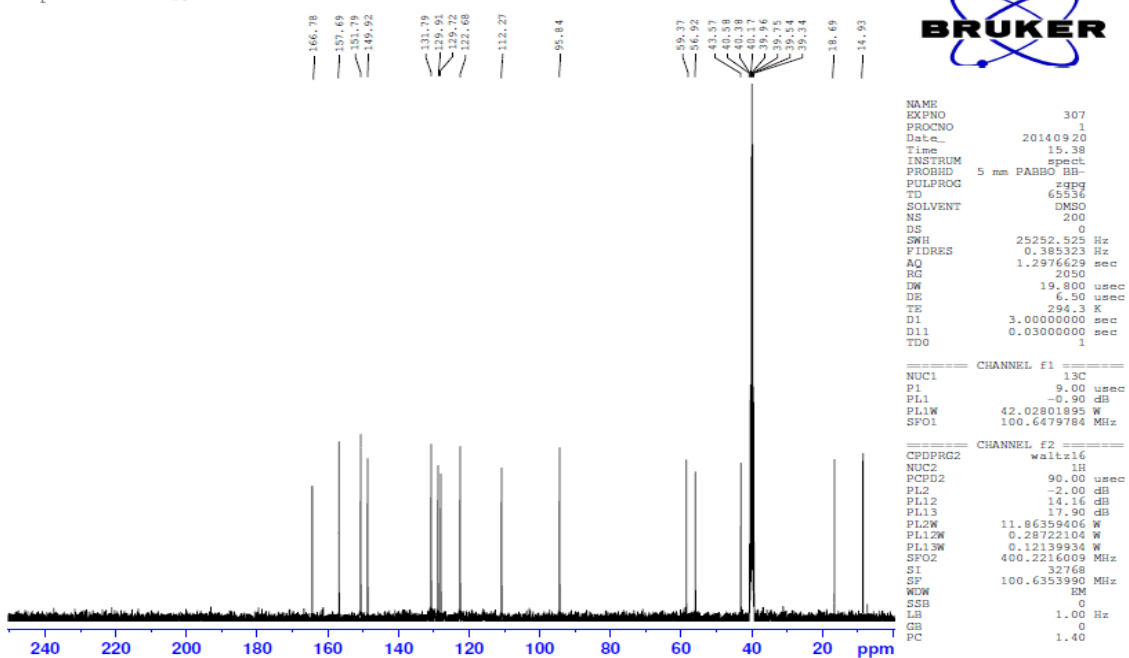



The <sup>1</sup>H NMR spectrum of 3,4-Dihydro-5-etoxy carbonyl-4-(3-methoxyphenyl)-6-methyl-pyrimidine-2(1H)-one (4m):

Sample code:abb17

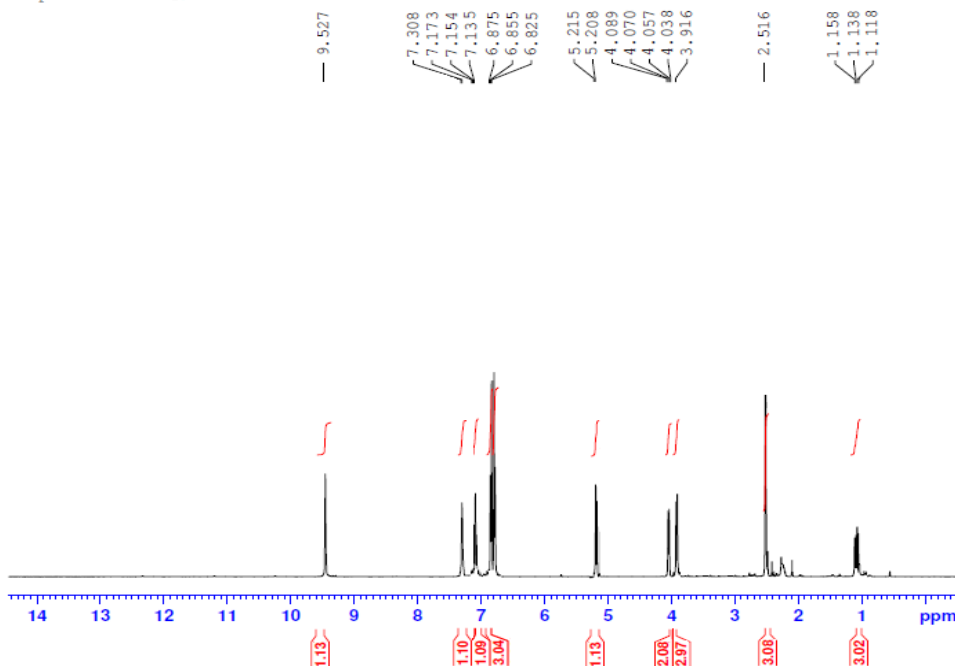

```

NAME          331
EXPNO         1
PROCNO        1
Date_         20140920
Time          13.21
INSTRUM       spect
PROBHD        5 mm PABBO BB-
PULPROG       zg30
TD            65536
SOLVENT       DMSO
NS            20
DS            0
SWH           8012.820 Hz
FIDRES        0.122266 Hz
AQ            4.0894966 sec
RG            2050
DW            62.400 usec
DE            6.50 usec
TE            293.0 K
D1            6.0000000 sec
TDO           1

===== CHANNEL f1 =====
NUC1          1H
P1            14.00 usec
PL1           -2.00 dB
PL1W          11.86359406 W
SFO1          400.2236020 MHz
SI            32768
SF            400.2200000 MHz
WDW           EM
SSB           0
LB            0.30 Hz
GB            0
PC            1.00
    
```

The <sup>13</sup>C NMR spectrum of 3,4-Dihydro-5-etoxy carbonyl-4-(3-methoxyphenyl)-6-methyl-pyrimidine-2(1H)-one (4m):

Sample code:abb17

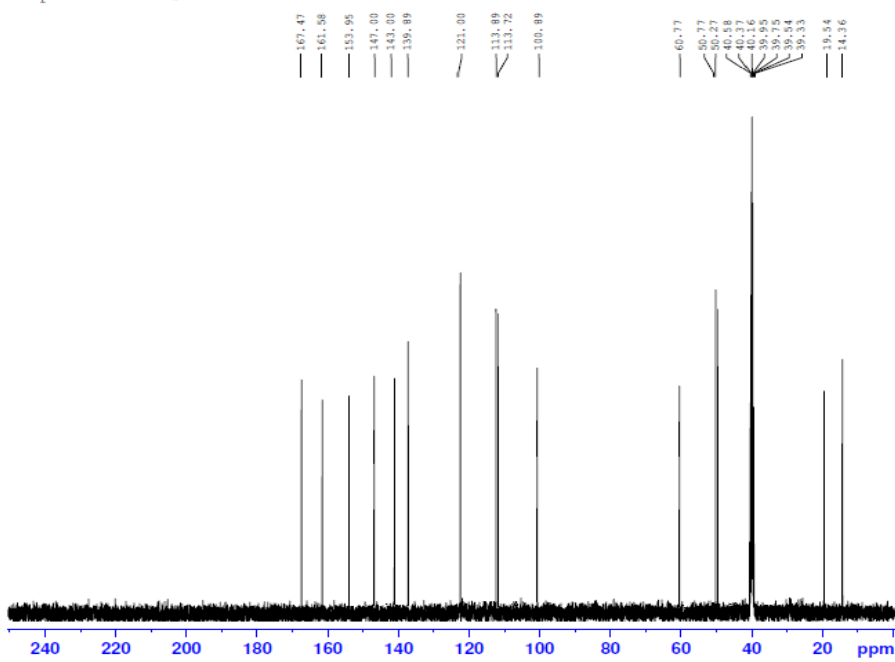

```

NAME          328
EXPNO         1
PROCNO        1
Date_         20140920
Time          17.14
INSTRUM       spect
PROBHD        5 mm PABBO BB-
PULPROG       zgpg
TD            65536
SOLVENT       DMSO
NS            66
DS            0
SWH           25252.525 Hz
FIDRES        0.385323 Hz
AQ            1.2976629 sec
RG            2050
DW            19.800 usec
DE            6.50 usec
TE            293.0 K
D1            3.0000000 sec
D11           0.0300000 sec
TDO           1

===== CHANNEL f1 =====
NUC1          13C
P1            9.00 usec
PL1           -0.90 dB
PL1W          42.02801895 W
SFO1          100.6479784 MHz

===== CHANNEL f2 =====
CPDPRG2       waltz16
NUC2          1H
PCPD2         90.00 usec
PL2           -2.00 dB
PL2W          14.16 dB
PL13         17.90 dB
PL2W          11.86359406 W
PL12W        0.28722104 W
PL13W        0.12139934 W
SFO2          400.2216009 MHz
SI            32768
SF            100.6353990 MHz
WDW           EM
SSB           0
LB            1.00 Hz
GB            0
PC            1.40
    
```

The <sup>1</sup>H NMR spectrum of 3,4-Dihydro-5-etoxy-carbonyl-4-(4-methoxyphenyl)-6-methyl-pyrimidine-2(1H)-one (4n):

Sample code:abb16

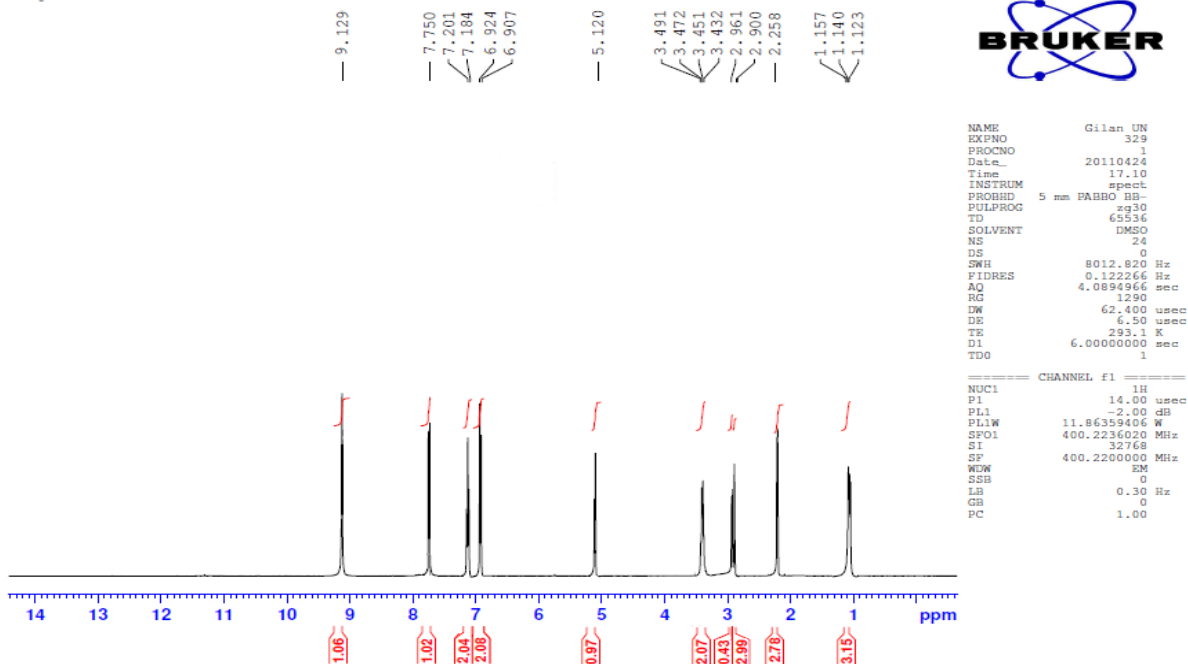

The <sup>13</sup>C NMR spectrum of 3,4-Dihydro-5-etoxy-carbonyl-4-(4-methoxyphenyl)-6-methyl-pyrimidine-2(1H)-one (4n):

Sample code:abb16

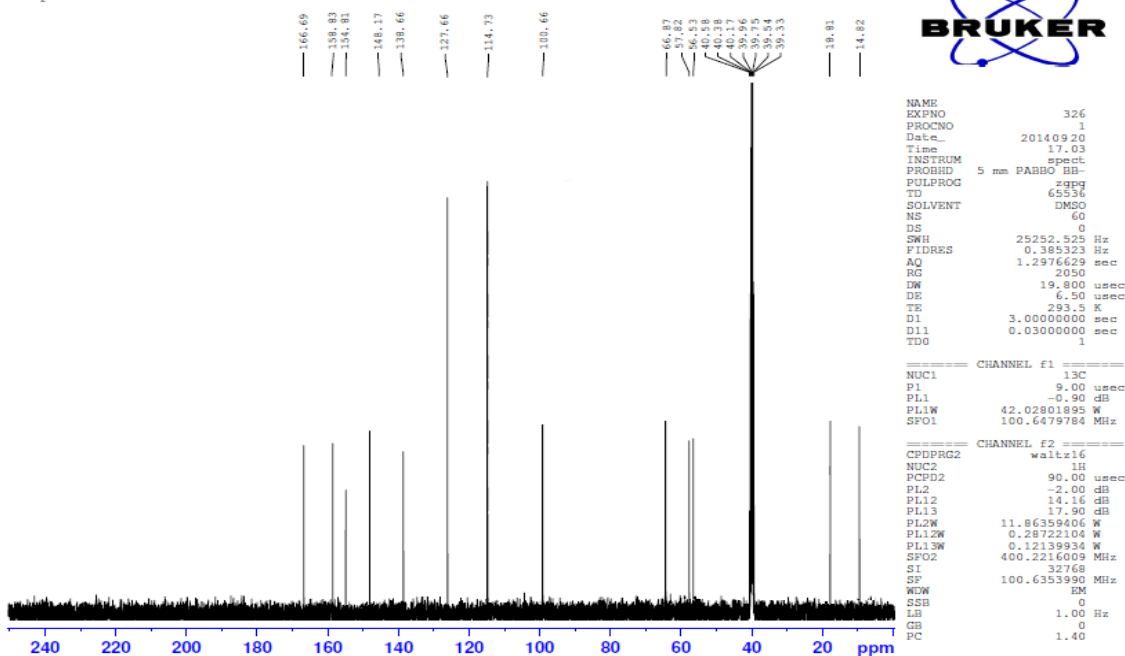

The <sup>1</sup>H NMR spectrum of 3,4-Dihydro-5-etoxy-carbonyl-4-(3,4-dimethoxyphenyl)-6-methyl-pyrimidine-2(1H)-one (4o):

Sample code:abb15

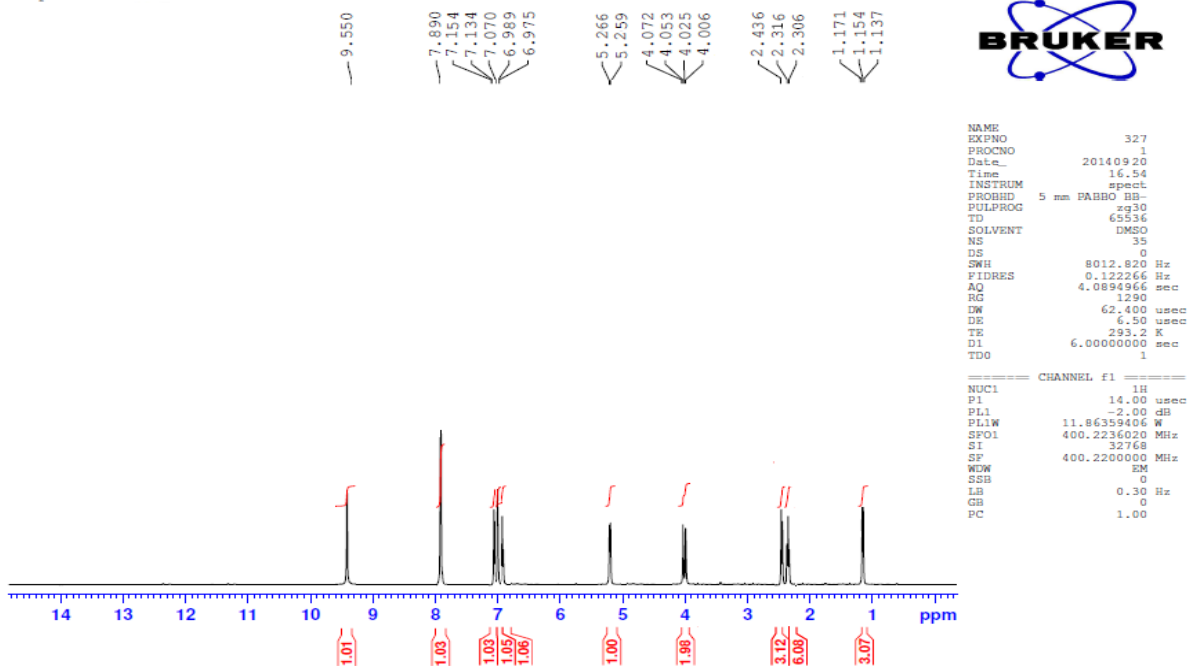

The <sup>13</sup>C NMR spectrum of 3,4-Dihydro-5-etoxy-carbonyl-4-(3,4-dimethoxyphenyl)-6-methyl-pyrimidine-2(1H)-one (4o):

Sample code:abb15

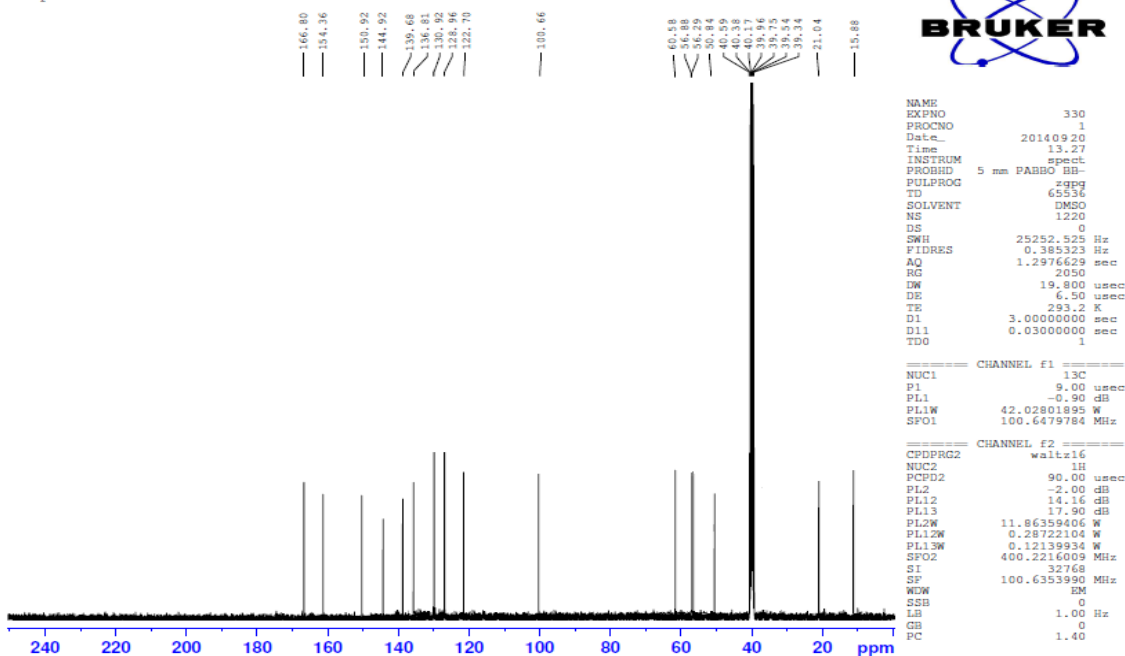

The <sup>1</sup>H NMR spectrum of 3,4-Dihydro-5-oxycarbonyl-4-(3-methoxy-4-hydroxyphenyl)-6-methyl-pyrimidine-2(1H)-one (4p):

Sample code:abb18

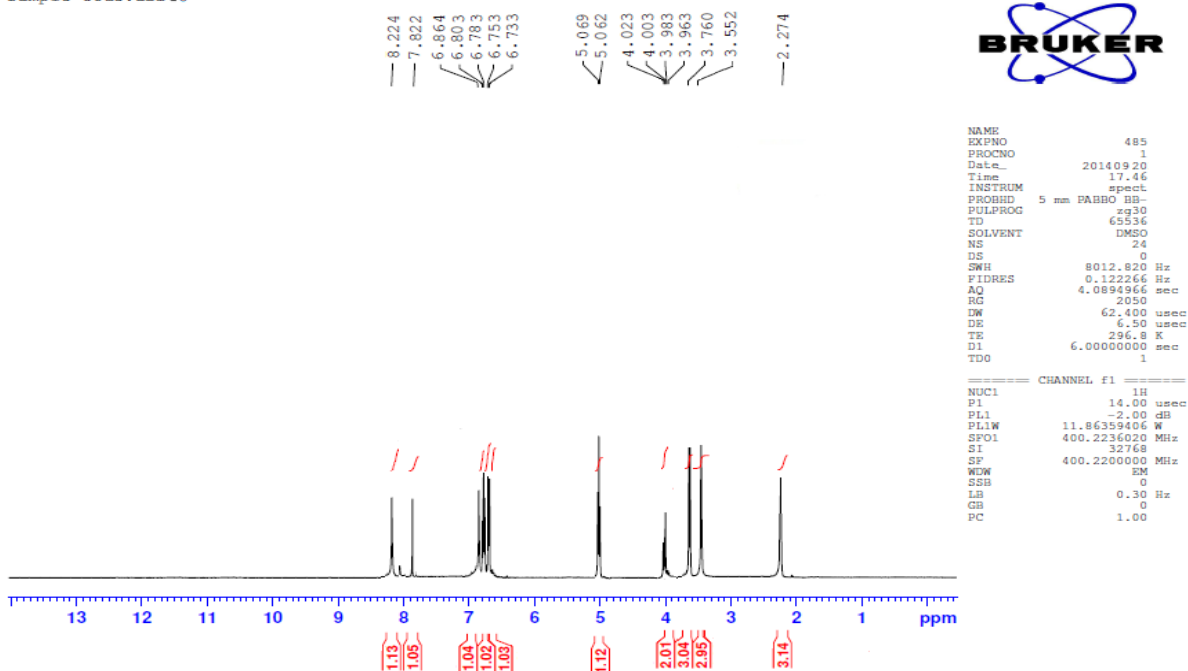

The <sup>13</sup>C NMR spectrum of 3,4-Dihydro-5-oxycarbonyl-4-(3-methoxy-4-hydroxyphenyl)-6-methyl-pyrimidine-2(1H)-one (4p):

Sample code:abb18

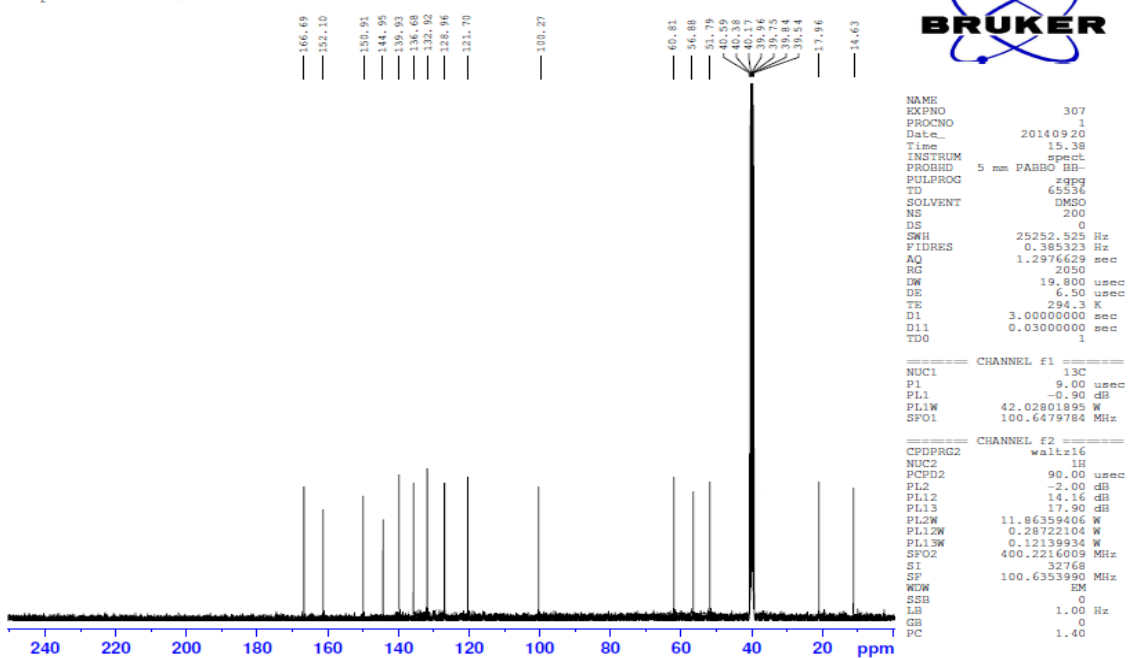

The <sup>1</sup>H NMR spectrum of 3,4-Dihydro-5-oxycarbonyl-4-(4-trifluoromethylphenyl)-6-methyl-pyrimidine-2(1H)-one (4q):

Sample code: abb3

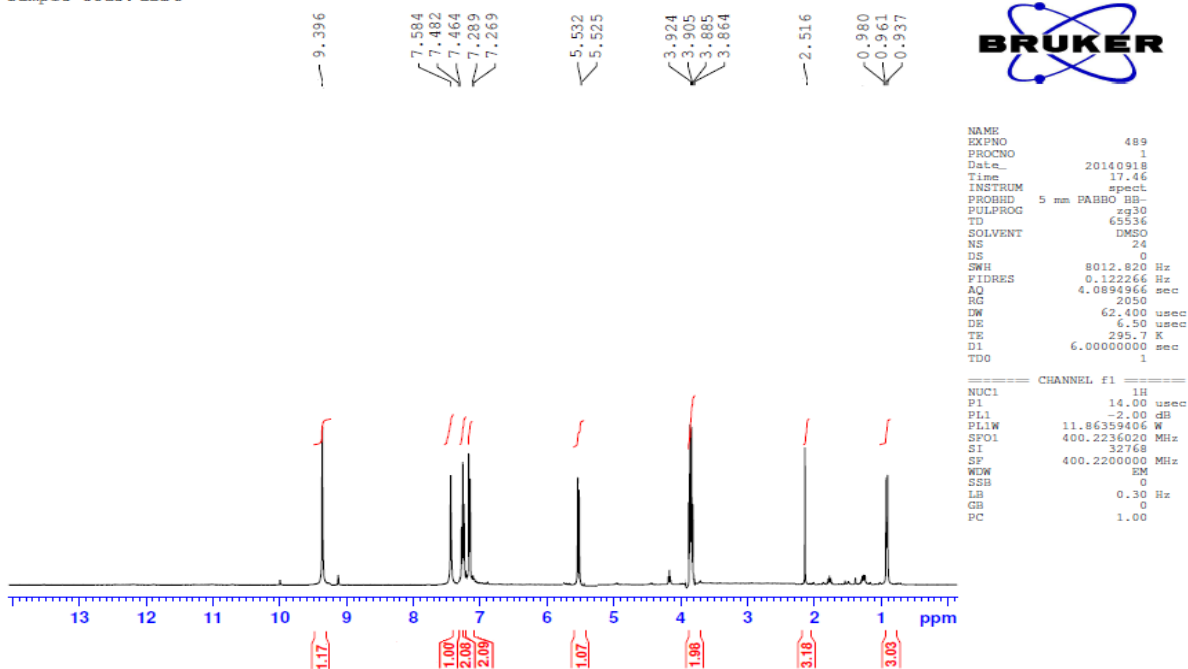

The <sup>13</sup>C NMR spectrum of 3,4-Dihydro-5-oxycarbonyl-4-(4-trifluoromethylphenyl)-6-methyl-pyrimidine-2(1H)-one (4q):

Sample code: abb3

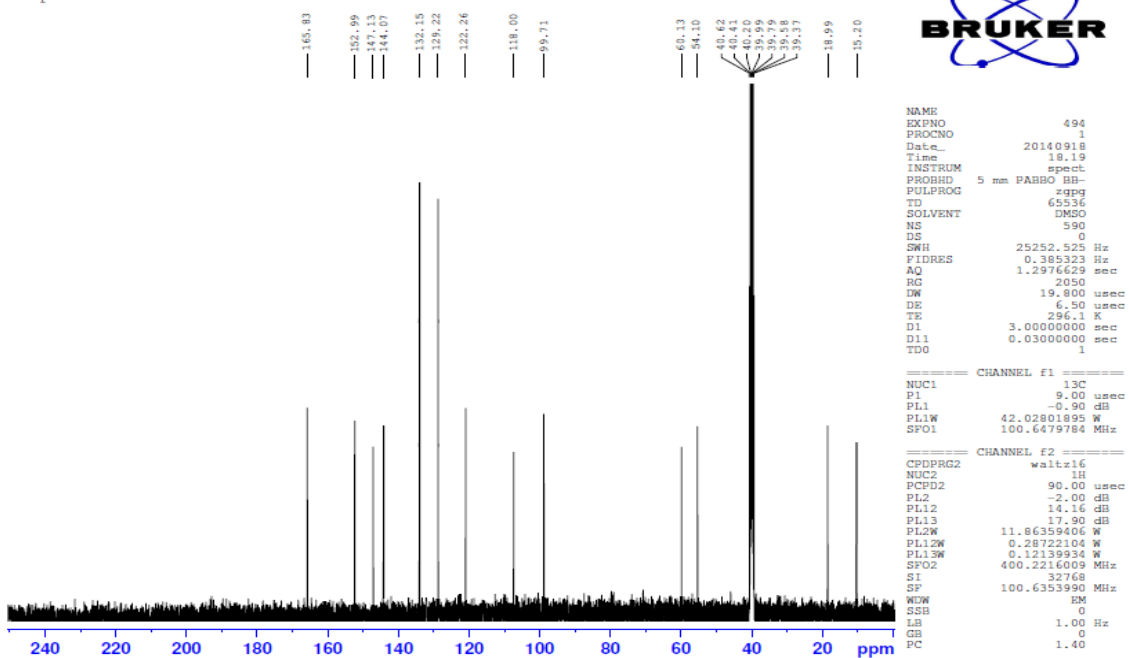

The <sup>1</sup>H NMR spectrum of 3,4-Dihydro-5-etoxy-carbonyl-4-(2-hydroxyphenyl)-6-methyl-pyrimidine-2(1H)-one (4r):

Sample code:abb12

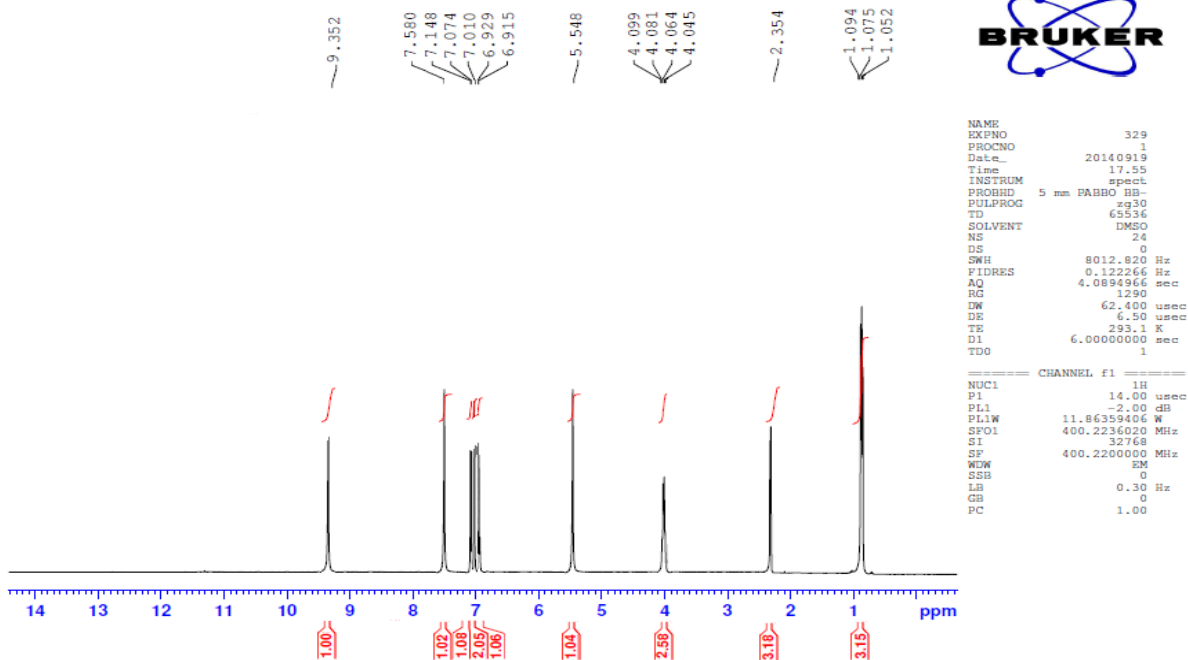

The <sup>13</sup>C NMR spectrum of 3,4-Dihydro-5-etoxy-carbonyl-4-(2-hydroxyphenyl)-6-methyl-pyrimidine-2(1H)-one (4r):

Sample code:abb12

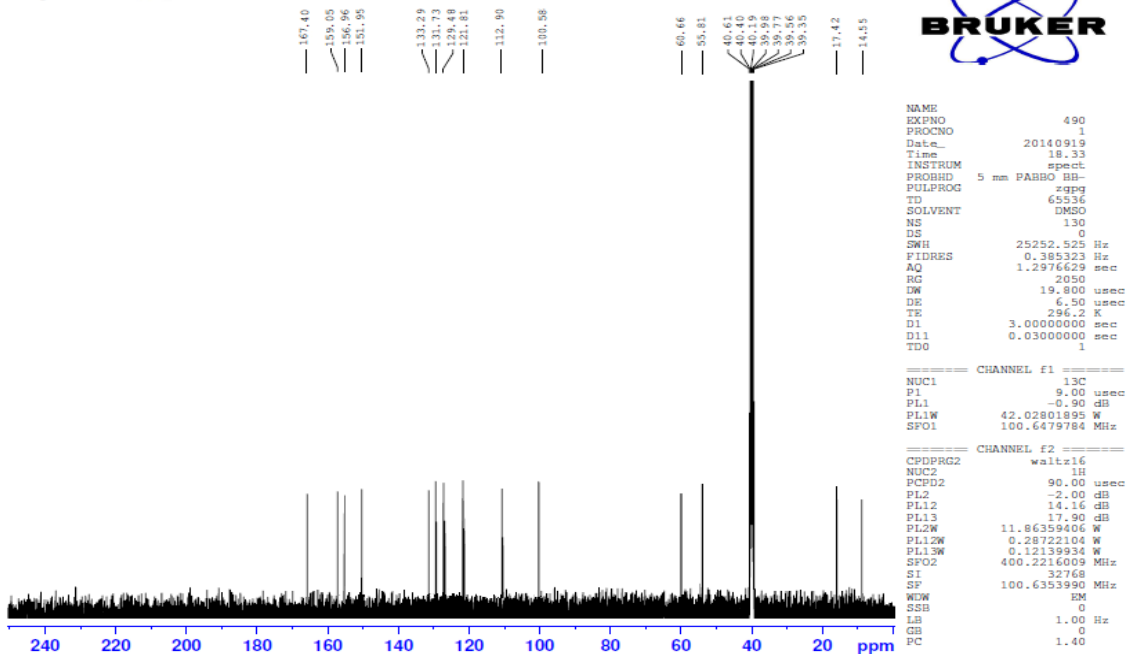

The <sup>1</sup>H NMR spectrum of 3,4-Dihydro-5-etoxy-carbonyl-4-(4-hydroxyphenyl)-6-methyl-pyrimidine-2(1H)-one (4s):

Sample code: abb13

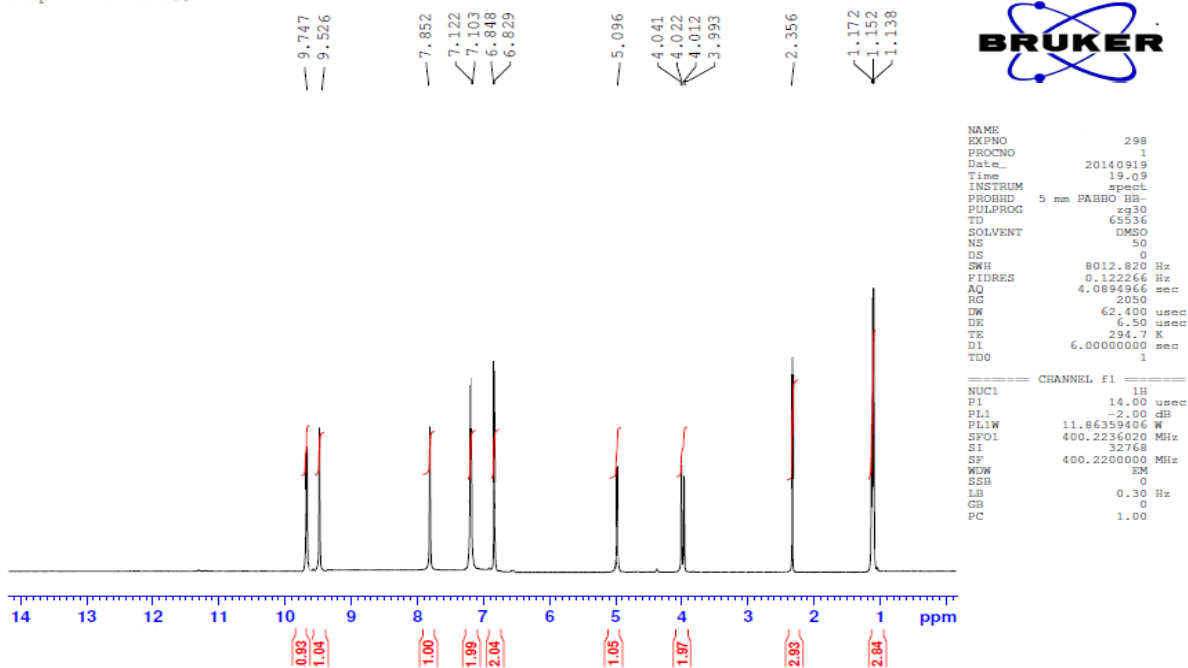

The <sup>13</sup>C NMR spectrum of 3,4-Dihydro-5-etoxy-carbonyl-4-(4-hydroxyphenyl)-6-methyl-pyrimidine-2(1H)-one (4s):

Sample code: abb13

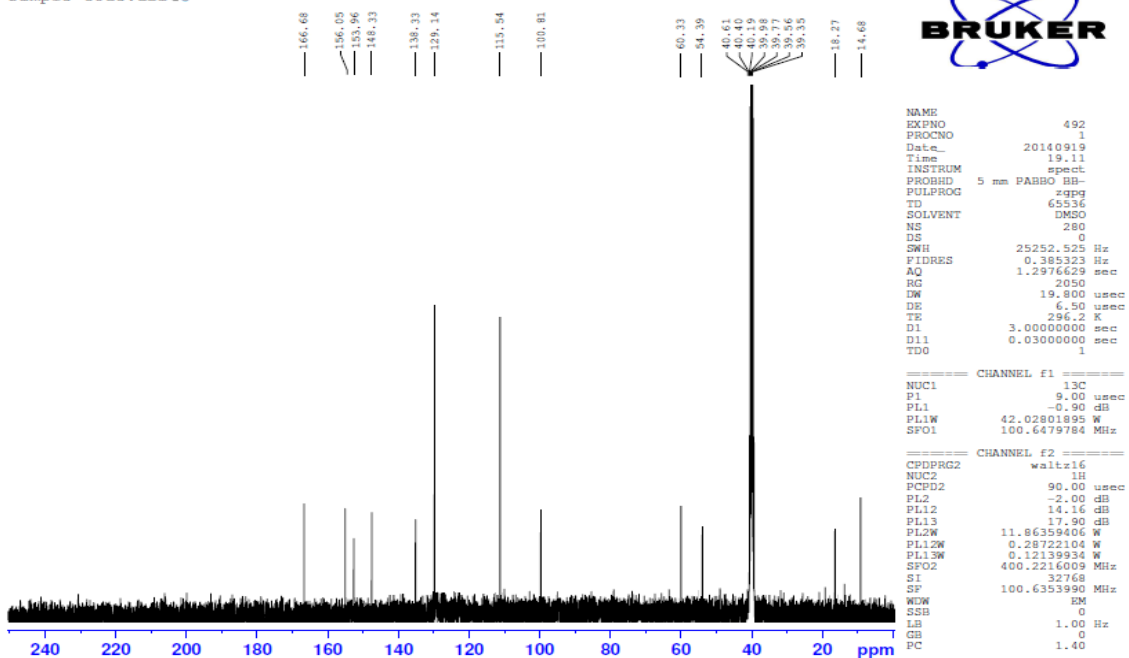





The <sup>1</sup>H NMR spectrum of 3,4-Dihydro-5-etoxy-carbonyl-4-(4-styryl)-6-methyl-pyrimidine-2(1H)-one (4u):

Sample code:abb19

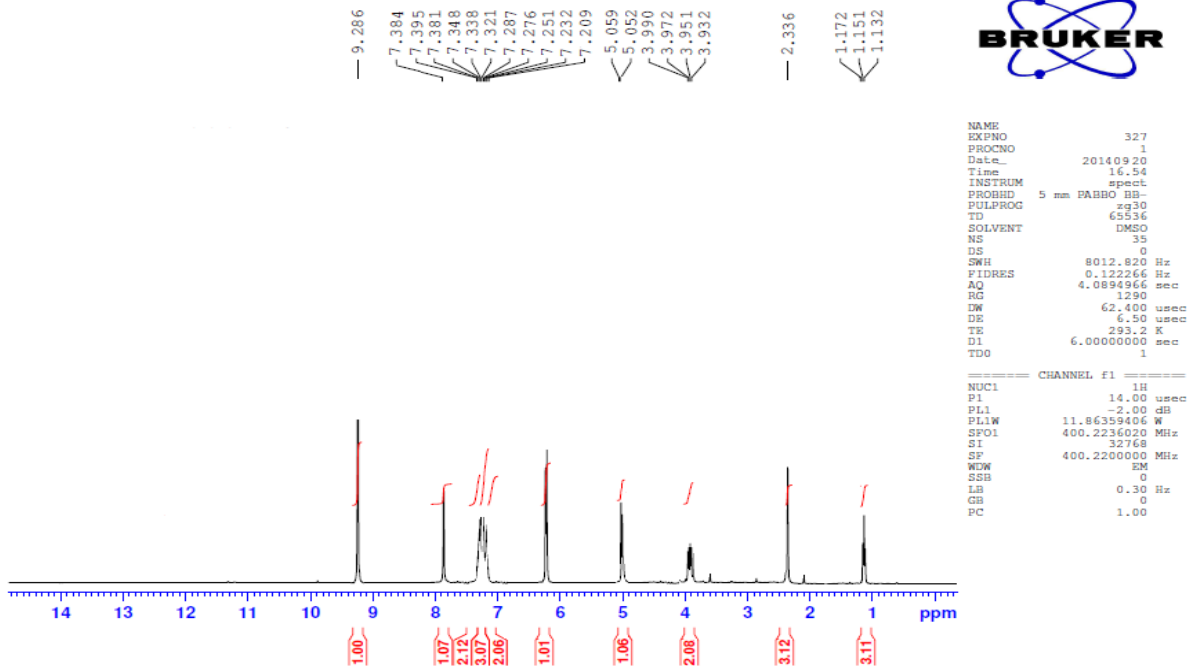

The <sup>13</sup>C NMR spectrum of 3,4-Dihydro-5-etoxy-carbonyl-4-(4-styryl)-6-methyl-pyrimidine-2(1H)-one (4u):

Sample code:abb19

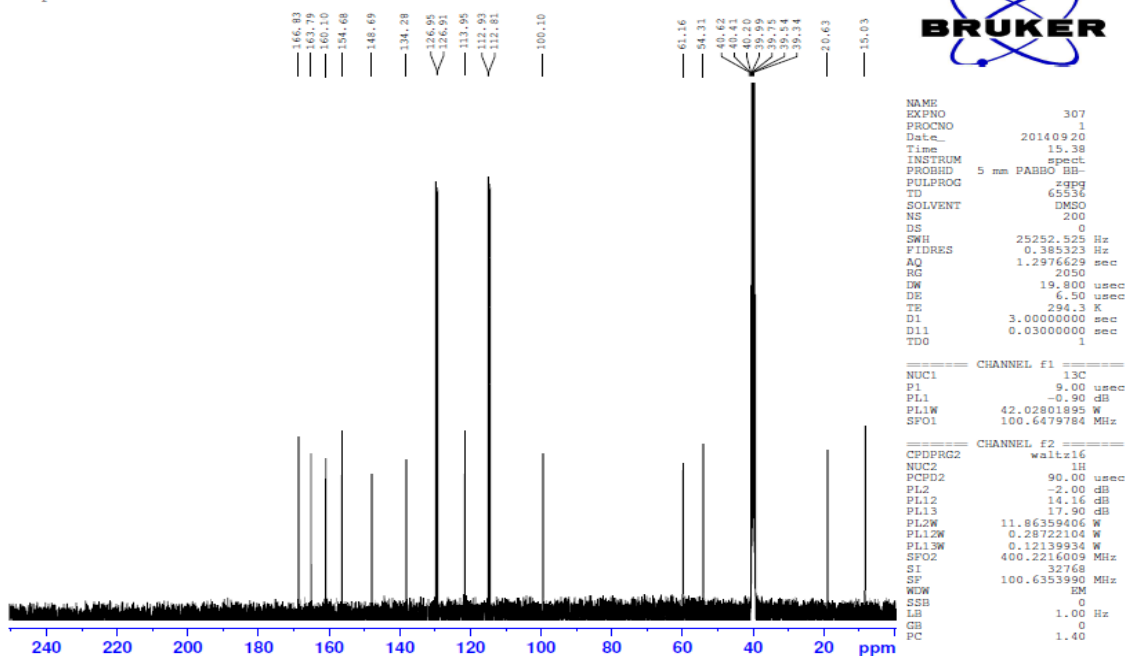

The <sup>1</sup>H NMR spectrum of 3,4-Dihydro-5-etoxy-carbonyl-4-(2-furyl)-6-methyl-pyrimidine-2(1H)-one (4v):

Sample code: abb1

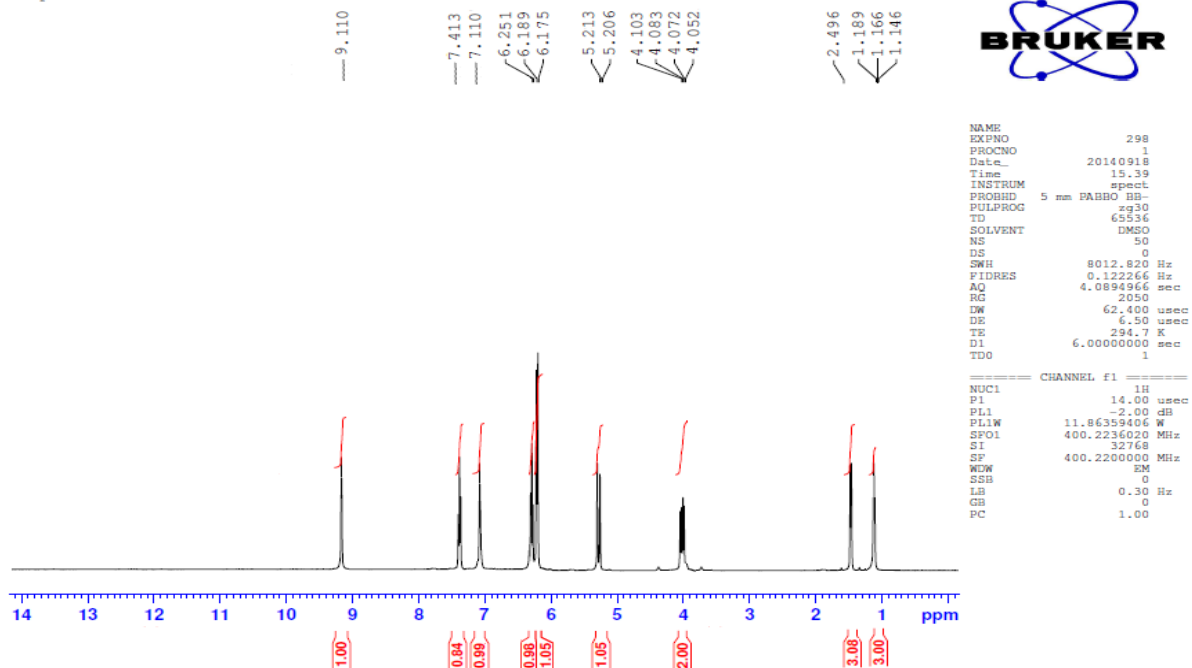

The <sup>13</sup>C NMR spectrum of 3,4-Dihydro-5-etoxy-carbonyl-4-(2-furyl)-6-methyl-pyrimidine-2(1H)-one (4v):

Sample code: abb1

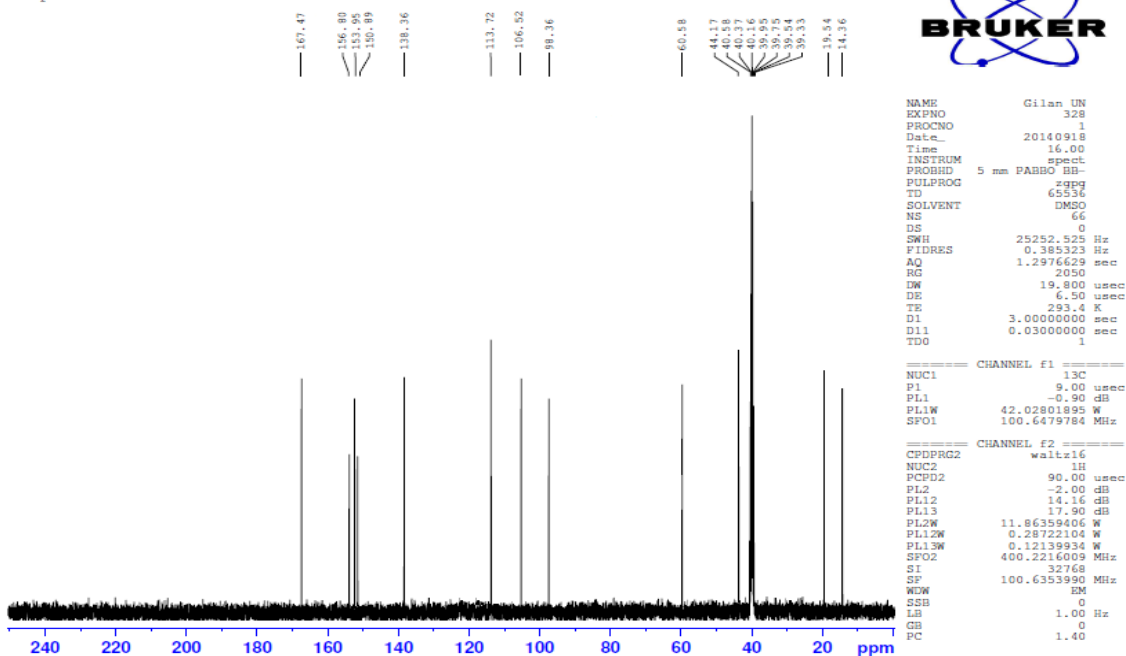

Supplement: c4ra07334g1.pdf [file c4ra07334g1.pdf]
